# Supplementary material
Source: publisher site journal article supplement (https://www.spandidos-publications.com/5064/downloadSupplementary)
Supplement: Supplementary file 1 [file downloadSupplementary]

## Sheet: Sheet1
Table SV. Gene set enrichment Gene Ontology analysis results according to the risk signature.
Name	GS<br> follow link to MSigDB	GS details	Size	ES	NES	NOM P-value	FDR q-value	FWER P-value	Rank at max	Leading edge
GOMF_CADHERIN_BINDING_INVOLVED_IN_CELL_CELL_ADHESION	GOMF_CADHERIN_BINDING_INVOLVED_IN_CELL_CELL_ADHESION	Details ...	18	0.874953	2.01941	0	0.112849	0.094	3322	tags=78%, list=6%, signal=83%
GOMF_CADHERIN_BINDING	GOMF_CADHERIN_BINDING	Details ...	330	0.617799	2.01558	0	0.0598218	0.097	5605	tags=49%, list=10%, signal=54%
GOCC_DESMOSOME	GOCC_DESMOSOME	Details ...	25	0.728846	1.91612	0	0.263335	0.315	5477	tags=68%, list=10%, signal=75%
GOBP_REGULATION_OF_DNA_TEMPLATED_TRANSCRIPTION_IN_RESPONSE_TO_STRESS	GOBP_REGULATION_OF_DNA_TEMPLATED_TRANSCRIPTION_IN_RESPONSE_TO_STRESS	Details ...	115	0.574592	1.81495	0	0.47948	0.623	5805	tags=48%, list=10%, signal=53%
GOBP_SKIN_DEVELOPMENT	GOBP_SKIN_DEVELOPMENT	Details ...	414	0.448196	1.69303	0	0.35823	0.899	5557	tags=29%, list=10%, signal=32%
GOBP_KERATINOCYTE_DIFFERENTIATION	GOBP_KERATINOCYTE_DIFFERENTIATION	Details ...	301	0.465725	1.68322	0	0.365322	0.913	7653	tags=33%, list=14%, signal=38%
GOMF_GALACTOSYLTRANSFERASE_ACTIVITY	GOMF_GALACTOSYLTRANSFERASE_ACTIVITY	Details ...	25	0.654352	1.8488	0.00198413	0.391577	0.517	6444	tags=60%, list=12%, signal=68%
GOMF_LAMININ_BINDING	GOMF_LAMININ_BINDING	Details ...	29	0.69074	1.88081	0.00200401	0.283833	0.415	4110	tags=48%, list=7%, signal=52%
GOBP_CYTOKINETIC_PROCESS	GOBP_CYTOKINETIC_PROCESS	Details ...	38	0.707362	1.89517	0.00201207	0.277507	0.371	4427	tags=55%, list=8%, signal=60%
GOBP_REGULATION_OF_EARLY_ENDOSOME_TO_LATE_ENDOSOME_TRANSPORT	GOBP_REGULATION_OF_EARLY_ENDOSOME_TO_LATE_ENDOSOME_TRANSPORT	Details ...	18	0.735152	1.78563	0.00201207	0.374582	0.713	4384	tags=56%, list=8%, signal=60%
GOBP_CELL_DIFFERENTIATION_INVOLVED_IN_EMBRYONIC_PLACENTA_DEVELOPMENT	GOBP_CELL_DIFFERENTIATION_INVOLVED_IN_EMBRYONIC_PLACENTA_DEVELOPMENT	Details ...	23	0.684392	1.76921	0.0020284	0.380051	0.75	2137	tags=57%, list=4%, signal=59%
GOBP_POSITIVE_REGULATION_OF_MITOCHONDRIAL_OUTER_MEMBRANE_PERMEABILIZATION_INVOLVED_IN_APOPTOTIC_SIGNALING_PATHWAY	GOBP_POSITIVE_REGULATION_OF_MITOCHONDRIAL_OUTER_MEMBRANE_PERMEABILIZATION_INVOLVED_IN_APOPTOTIC_SIGNALING_PATHWAY	Details ...	35	0.616584	1.75784	0.00203252	0.356373	0.777	4120	tags=46%, list=7%, signal=49%
GOBP_REGULATION_OF_MITOCHONDRIAL_OUTER_MEMBRANE_PERMEABILIZATION_INVOLVED_IN_APOPTOTIC_SIGNALING_PATHWAY	GOBP_REGULATION_OF_MITOCHONDRIAL_OUTER_MEMBRANE_PERMEABILIZATION_INVOLVED_IN_APOPTOTIC_SIGNALING_PATHWAY	Details ...	44	0.578487	1.72092	0.00204499	0.362904	0.857	4120	tags=39%, list=7%, signal=42%
GOCC_MICROVILLUS_MEMBRANE	GOCC_MICROVILLUS_MEMBRANE	Details ...	26	0.649703	1.79902	0.00208333	0.429773	0.672	8034	tags=69%, list=15%, signal=81%
GOCC_PROTEASOME_ACCESSORY_COMPLEX	GOCC_PROTEASOME_ACCESSORY_COMPLEX	Details ...	24	0.791775	1.81344	0.0038835	0.434531	0.632	6884	tags=71%, list=12%, signal=81%
GOBP_REGULATION_OF_WATER_LOSS_VIA_SKIN	GOBP_REGULATION_OF_WATER_LOSS_VIA_SKIN	Details ...	26	0.630215	1.79482	0.00392927	0.416257	0.679	3641	tags=50%, list=7%, signal=53%
GOBP_LATE_ENDOSOME_TO_VACUOLE_TRANSPORT	GOBP_LATE_ENDOSOME_TO_VACUOLE_TRANSPORT	Details ...	25	0.675026	1.74636	0.00395257	0.345311	0.805	6522	tags=56%, list=12%, signal=63%
GOBP_MIDBODY_ABSCISSION	GOBP_MIDBODY_ABSCISSION	Details ...	17	0.765774	1.77646	0.0040404	0.369558	0.735	4427	tags=65%, list=8%, signal=70%
GOBP_EPIDERMAL_CELL_DIFFERENTIATION	GOBP_EPIDERMAL_CELL_DIFFERENTIATION	Details ...	359	0.437888	1.635	0.00404858	0.377147	0.953	8214	tags=34%, list=15%, signal=39%
GOMF_CELL_CELL_ADHESION_MEDIATOR_ACTIVITY	GOMF_CELL_CELL_ADHESION_MEDIATOR_ACTIVITY	Details ...	49	0.551392	1.78826	0.00408163	0.38854	0.704	3322	tags=43%, list=6%, signal=46%
GOMF_CELL_ADHESION_MEDIATOR_ACTIVITY	GOMF_CELL_ADHESION_MEDIATOR_ACTIVITY	Details ...	58	0.534097	1.76518	0.00410678	0.358905	0.759	3322	tags=40%, list=6%, signal=42%
GOBP_EPIDERMIS_DEVELOPMENT	GOBP_EPIDERMIS_DEVELOPMENT	Details ...	462	0.424964	1.62422	0.00583658	0.391079	0.963	5557	tags=28%, list=10%, signal=31%
GOBP_MULTIVESICULAR_BODY_SORTING_PATHWAY	GOBP_MULTIVESICULAR_BODY_SORTING_PATHWAY	Details ...	37	0.633599	1.76782	0.00585938	0.365875	0.752	5654	tags=54%, list=10%, signal=60%
GOBP_HEPATOCYTE_GROWTH_FACTOR_RECEPTOR_SIGNALING_PATHWAY	GOBP_HEPATOCYTE_GROWTH_FACTOR_RECEPTOR_SIGNALING_PATHWAY	Details ...	16	0.630104	1.71093	0.00585938	0.360879	0.869	3514	tags=44%, list=6%, signal=47%
GOBP_ORGANELLE_INHERITANCE	GOBP_ORGANELLE_INHERITANCE	Details ...	15	0.722669	1.83333	0.00596422	0.420353	0.559	3554	tags=33%, list=6%, signal=36%
GOBP_MITOTIC_CYTOKINETIC_PROCESS	GOBP_MITOTIC_CYTOKINETIC_PROCESS	Details ...	23	0.706086	1.7408	0.0059761	0.354203	0.818	4427	tags=61%, list=8%, signal=66%
GOBP_REGULATION_OF_TRANSLATIONAL_INITIATION_IN_RESPONSE_TO_STRESS	GOBP_REGULATION_OF_TRANSLATIONAL_INITIATION_IN_RESPONSE_TO_STRESS	Details ...	15	0.730854	1.70809	0.00607287	0.352914	0.874	11791	tags=80%, list=21%, signal=102%
GOBP_FUCOSYLATION	GOBP_FUCOSYLATION	Details ...	17	0.643953	1.70515	0.00607287	0.346897	0.88	5997	tags=53%, list=11%, signal=59%
GOBP_MICROVILLUS_ORGANIZATION	GOBP_MICROVILLUS_ORGANIZATION	Details ...	24	0.674419	1.76224	0.00609756	0.354425	0.769	3108	tags=50%, list=6%, signal=53%
GOBP_ANTIGEN_PROCESSING_AND_PRESENTATION_OF_PEPTIDE_ANTIGEN_VIA_MHC_CLASS_I	GOBP_ANTIGEN_PROCESSING_AND_PRESENTATION_OF_PEPTIDE_ANTIGEN_VIA_MHC_CLASS_I	Details ...	99	0.60197	1.72991	0.00766283	0.386454	0.837	6884	tags=57%, list=12%, signal=64%
GOMF_UDP_GALACTOSYLTRANSFERASE_ACTIVITY	GOMF_UDP_GALACTOSYLTRANSFERASE_ACTIVITY	Details ...	21	0.643436	1.79155	0.0078125	0.401121	0.69	6444	tags=62%, list=12%, signal=70%
GOBP_MULTIVESICULAR_BODY_ORGANIZATION	GOBP_MULTIVESICULAR_BODY_ORGANIZATION	Details ...	31	0.65472	1.72713	0.0078125	0.372474	0.843	5605	tags=55%, list=10%, signal=61%
GOBP_KERATINOCYTE_PROLIFERATION	GOBP_KERATINOCYTE_PROLIFERATION	Details ...	47	0.54928	1.72429	0.00803213	0.371159	0.851	4568	tags=43%, list=8%, signal=46%
GOCC_ENDOPEPTIDASE_COMPLEX	GOCC_ENDOPEPTIDASE_COMPLEX	Details ...	68	0.687955	1.80288	0.00980392	0.450675	0.666	6884	tags=62%, list=12%, signal=70%
GOMF_LIPASE_INHIBITOR_ACTIVITY	GOMF_LIPASE_INHIBITOR_ACTIVITY	Details ...	18	0.645512	1.72984	0.00984252	0.373493	0.837	3795	tags=39%, list=7%, signal=42%
GOBP_ENDOSOME_TRANSPORT_VIA_MULTIVESICULAR_BODY_SORTING_PATHWAY	GOBP_ENDOSOME_TRANSPORT_VIA_MULTIVESICULAR_BODY_SORTING_PATHWAY	Details ...	31	0.647796	1.75152	0.00990099	0.351127	0.791	5654	tags=55%, list=10%, signal=61%
GOBP_VIRAL_RELEASE_FROM_HOST_CELL	GOBP_VIRAL_RELEASE_FROM_HOST_CELL	Details ...	33	0.655458	1.7102	0.00992064	0.353863	0.87	7056	tags=58%, list=13%, signal=66%
GOBP_CELLULAR_RESPONSE_TO_ARSENIC_CONTAINING_SUBSTANCE	GOBP_CELLULAR_RESPONSE_TO_ARSENIC_CONTAINING_SUBSTANCE	Details ...	18	0.629828	1.68193	0.01	0.362921	0.914	11220	tags=61%, list=20%, signal=77%
GOBP_NOTOCHORD_DEVELOPMENT	GOBP_NOTOCHORD_DEVELOPMENT	Details ...	17	0.629653	1.67158	0.0100604	0.380863	0.924	4013	tags=47%, list=7%, signal=51%
GOBP_MOVEMENT_IN_HOST_ENVIRONMENT	GOBP_MOVEMENT_IN_HOST_ENVIRONMENT	Details ...	175	0.491344	1.66445	0.0101833	0.367025	0.937	5005	tags=39%, list=9%, signal=43%
GOCC_MITOCHONDRIA_ASSOCIATED_ENDOPLASMIC_RETICULUM_MEMBRANE	GOCC_MITOCHONDRIA_ASSOCIATED_ENDOPLASMIC_RETICULUM_MEMBRANE	Details ...	20	0.675465	1.74934	0.0102041	0.34551	0.793	4742	tags=45%, list=9%, signal=49%
GOBP_O_GLYCAN_PROCESSING	GOBP_O_GLYCAN_PROCESSING	Details ...	60	0.544478	1.71683	0.0102041	0.368446	0.864	5751	tags=43%, list=10%, signal=48%
GOMF_NF_KAPPAB_BINDING	GOMF_NF_KAPPAB_BINDING	Details ...	29	0.625517	1.69977	0.0102041	0.358966	0.891	3885	tags=45%, list=7%, signal=48%
GOCC_DNA_PACKAGING_COMPLEX	GOCC_DNA_PACKAGING_COMPLEX	Details ...	114	0.588225	1.68575	0.0102881	0.370555	0.906	5515	tags=41%, list=10%, signal=46%
GOBP_MICROVILLUS_ASSEMBLY	GOBP_MICROVILLUS_ASSEMBLY	Details ...	16	0.693226	1.75485	0.0104822	0.352254	0.78	4956	tags=63%, list=9%, signal=69%
GOCC_COPI_COATED_VESICLE_MEMBRANE	GOCC_COPI_COATED_VESICLE_MEMBRANE	Details ...	18	0.729345	1.72363	0.0117878	0.362133	0.852	4521	tags=61%, list=8%, signal=67%
GOCC_ENDOPLASMIC_RETICULUM_PROTEIN_CONTAINING_COMPLEX	GOCC_ENDOPLASMIC_RETICULUM_PROTEIN_CONTAINING_COMPLEX	Details ...	127	0.532238	1.68471	0.011811	0.367203	0.906	7502	tags=49%, list=14%, signal=56%
GOBP_REGULATION_OF_MEMBRANE_PERMEABILITY	GOBP_REGULATION_OF_MEMBRANE_PERMEABILITY		84	0.470962	1.58278	0.011976	0.418346	0.98	4267	tags=33%, list=8%, signal=36%
GOBP_MORPHOGENESIS_OF_A_POLARIZED_EPITHELIUM	GOBP_MORPHOGENESIS_OF_A_POLARIZED_EPITHELIUM	Details ...	144	0.473677	1.59723	0.0121457	0.421808	0.976	6326	tags=47%, list=11%, signal=52%
GOBP_NEGATIVE_REGULATION_OF_KERATINOCYTE_PROLIFERATION	GOBP_NEGATIVE_REGULATION_OF_KERATINOCYTE_PROLIFERATION	Details ...	15	0.701647	1.78512	0.0121704	0.353247	0.714	3053	tags=60%, list=6%, signal=63%
GOBP_REGULATION_OF_MITOCHONDRIAL_MEMBRANE_PERMEABILITY	GOBP_REGULATION_OF_MITOCHONDRIAL_MEMBRANE_PERMEABILITY	Details ...	71	0.501798	1.60795	0.0139442	0.406143	0.968	5398	tags=37%, list=10%, signal=41%
GOBP_MONOSACCHARIDE_CATABOLIC_PROCESS	GOBP_MONOSACCHARIDE_CATABOLIC_PROCESS	Details ...	62	0.518375	1.68795	0.014	0.369763	0.904	5219	tags=40%, list=9%, signal=44%
GOBP_PURINE_NUCLEOBASE_METABOLIC_PROCESS	GOBP_PURINE_NUCLEOBASE_METABOLIC_PROCESS	Details ...	19	0.658507	1.69356	0.0142566	0.364384	0.896	8582	tags=68%, list=16%, signal=81%
GOBP_MITOTIC_CYTOKINESIS	GOBP_MITOTIC_CYTOKINESIS	Details ...	70	0.560442	1.71418	0.0143737	0.35834	0.868	4427	tags=43%, list=8%, signal=47%
GOBP_NUCLEOBASE_METABOLIC_PROCESS	GOBP_NUCLEOBASE_METABOLIC_PROCESS	Details ...	34	0.634023	1.69636	0.0146138	0.362541	0.893	7601	tags=56%, list=14%, signal=65%
GOBP_REGULATION_OF_EXOSOMAL_SECRETION	GOBP_REGULATION_OF_EXOSOMAL_SECRETION	Details ...	16	0.654236	1.66351	0.0155945	0.358231	0.937	5327	tags=50%, list=10%, signal=55%
GOCC_PEPTIDASE_COMPLEX	GOCC_PEPTIDASE_COMPLEX	Details ...	92	0.582294	1.67943	0.0156863	0.365576	0.917	6884	tags=54%, list=12%, signal=62%
GOBP_PROTEIN_HYDROXYLATION	GOBP_PROTEIN_HYDROXYLATION	Details ...	27	0.578842	1.59449	0.0160321	0.414229	0.978	5268	tags=44%, list=10%, signal=49%
GOBP_BIOLOGICAL_PROCESS_INVOLVED_IN_INTERACTION_WITH_HOST	GOBP_BIOLOGICAL_PROCESS_INVOLVED_IN_INTERACTION_WITH_HOST	Details ...	219	0.465574	1.60282	0.0161943	0.415663	0.972	6239	tags=40%, list=11%, signal=45%
GOCC_PROTEIN_DNA_COMPLEX	GOCC_PROTEIN_DNA_COMPLEX	Details ...	205	0.499545	1.62731	0.0162602	0.384819	0.962	5935	tags=38%, list=11%, signal=42%
GOBP_MEMBRANE_PROTEIN_INTRACELLULAR_DOMAIN_PROTEOLYSIS	GOBP_MEMBRANE_PROTEIN_INTRACELLULAR_DOMAIN_PROTEOLYSIS	Details ...	20	0.642365	1.61639	0.0164609	0.390825	0.964	3142	tags=55%, list=6%, signal=58%
GOBP_REGULATION_OF_MITOTIC_SPINDLE_ASSEMBLY	GOBP_REGULATION_OF_MITOTIC_SPINDLE_ASSEMBLY	Details ...	18	0.69662	1.67497	0.016632	0.375242	0.923	4427	tags=61%, list=8%, signal=66%
GOBP_NUCLEOBASE_CONTAINING_SMALL_MOLECULE_INTERCONVERSION	GOBP_NUCLEOBASE_CONTAINING_SMALL_MOLECULE_INTERCONVERSION	Details ...	27	0.612521	1.65001	0.0176125	0.355369	0.949	6002	tags=48%, list=11%, signal=54%
GOBP_APICAL_JUNCTION_ASSEMBLY	GOBP_APICAL_JUNCTION_ASSEMBLY	Details ...	86	0.51054	1.66408	0.0179641	0.362263	0.937	6668	tags=49%, list=12%, signal=55%
GOBP_MAINTENANCE_OF_PROTEIN_LOCALIZATION_IN_ORGANELLE	GOBP_MAINTENANCE_OF_PROTEIN_LOCALIZATION_IN_ORGANELLE	Details ...	42	0.515605	1.61735	0.0181087	0.396267	0.964	7036	tags=43%, list=13%, signal=49%
GOBP_CELL_CELL_JUNCTION_ASSEMBLY	GOBP_CELL_CELL_JUNCTION_ASSEMBLY		146	0.427731	1.53553	0.0181087	0.41744	0.99	6868	tags=41%, list=12%, signal=47%
GOBP_NAD_METABOLIC_PROCESS	GOBP_NAD_METABOLIC_PROCESS	Details ...	51	0.518985	1.66826	0.0181818	0.379062	0.928	2961	tags=33%, list=5%, signal=35%
GOBP_PURINE_NUCLEOSIDE_MONOPHOSPHATE_METABOLIC_PROCESS	GOBP_PURINE_NUCLEOSIDE_MONOPHOSPHATE_METABOLIC_PROCESS	Details ...	43	0.560981	1.66733	0.0182186	0.375615	0.928	4735	tags=51%, list=9%, signal=56%
GOBP_CHROMATIN_REMODELING_AT_CENTROMERE	GOBP_CHROMATIN_REMODELING_AT_CENTROMERE	Details ...	47	0.666029	1.71441	0.0182927	0.367718	0.868	7476	tags=55%, list=14%, signal=64%
GOBP_ENTRY_INTO_HOST	GOBP_ENTRY_INTO_HOST		153	0.468428	1.592	0.0184426	0.414694	0.98	5005	tags=38%, list=9%, signal=42%
GOCC_CORNIFIED_ENVELOPE	GOCC_CORNIFIED_ENVELOPE	Details ...	45	0.628817	1.65968	0.0185185	0.360444	0.94	5477	tags=49%, list=10%, signal=54%
GOBP_NEGATIVE_REGULATION_OF_PROGRAMMED_NECROTIC_CELL_DEATH	GOBP_NEGATIVE_REGULATION_OF_PROGRAMMED_NECROTIC_CELL_DEATH	Details ...	17	0.606354	1.61657	0.0189753	0.394683	0.964	6449	tags=53%, list=12%, signal=60%
GOCC_CYCLIN_DEPENDENT_PROTEIN_KINASE_HOLOENZYME_COMPLEX	GOCC_CYCLIN_DEPENDENT_PROTEIN_KINASE_HOLOENZYME_COMPLEX	Details ...	43	0.618737	1.70639	0.0193966	0.350441	0.877	8266	tags=60%, list=15%, signal=71%
GOBP_NEGATIVE_REGULATION_OF_INTRINSIC_APOPTOTIC_SIGNALING_PATHWAY	GOBP_NEGATIVE_REGULATION_OF_INTRINSIC_APOPTOTIC_SIGNALING_PATHWAY		93	0.449986	1.55683	0.0194553	0.407471	0.987	8636	tags=47%, list=16%, signal=56%
GOBP_RESPONSE_TO_DSRNA	GOBP_RESPONSE_TO_DSRNA	Details ...	54	0.507217	1.66599	0.0194932	0.367427	0.931	6108	tags=41%, list=11%, signal=46%
GOBP_REGULATION_OF_TRANSCRIPTION_FROM_RNA_POLYMERASE_II_PROMOTER_IN_RESPONSE_TO_HYPOXIA	GOBP_REGULATION_OF_TRANSCRIPTION_FROM_RNA_POLYMERASE_II_PROMOTER_IN_RESPONSE_TO_HYPOXIA	Details ...	77	0.571092	1.66864	0.0195312	0.384876	0.928	6326	tags=52%, list=11%, signal=59%
GOBP_NADH_METABOLIC_PROCESS	GOBP_NADH_METABOLIC_PROCESS	Details ...	43	0.545283	1.6212	0.0198807	0.396863	0.964	2961	tags=35%, list=5%, signal=37%
GOBP_MITOCHONDRIAL_OUTER_MEMBRANE_PERMEABILIZATION	GOBP_MITOCHONDRIAL_OUTER_MEMBRANE_PERMEABILIZATION		55	0.497916	1.57772	0.0198807	0.424996	0.98	5015	tags=35%, list=9%, signal=38%
GOBP_CELL_CELL_JUNCTION_ORGANIZATION	GOBP_CELL_CELL_JUNCTION_ORGANIZATION		208	0.428138	1.55576	0.0200401	0.404803	0.988	5387	tags=37%, list=10%, signal=40%
GOMF_TRANSFERASE_ACTIVITY_TRANSFERRING_HEXOSYL_GROUPS	GOMF_TRANSFERASE_ACTIVITY_TRANSFERRING_HEXOSYL_GROUPS		200	0.421109	1.55476	0.0200803	0.405204	0.988	6513	tags=38%, list=12%, signal=43%
GOBP_ESTABLISHMENT_OR_MAINTENANCE_OF_BIPOLAR_CELL_POLARITY	GOBP_ESTABLISHMENT_OR_MAINTENANCE_OF_BIPOLAR_CELL_POLARITY		45	0.472741	1.55104	0.020202	0.408357	0.988	7134	tags=49%, list=13%, signal=56%
GOBP_POSITIVE_REGULATION_OF_CELL_AGING	GOBP_POSITIVE_REGULATION_OF_CELL_AGING	Details ...	17	0.606011	1.65735	0.0204499	0.346252	0.941	5363	tags=53%, list=10%, signal=59%
GOBP_ANTIGEN_PROCESSING_AND_PRESENTATION_OF_EXOGENOUS_PEPTIDE_ANTIGEN_VIA_MHC_CLASS_I	GOBP_ANTIGEN_PROCESSING_AND_PRESENTATION_OF_EXOGENOUS_PEPTIDE_ANTIGEN_VIA_MHC_CLASS_I	Details ...	80	0.618043	1.66268	0.0211132	0.355628	0.938	5798	tags=58%, list=10%, signal=64%
GOBP_VIRAL_BUDDING_VIA_HOST_ESCRT_COMPLEX	GOBP_VIRAL_BUDDING_VIA_HOST_ESCRT_COMPLEX	Details ...	21	0.666535	1.65914	0.0211538	0.351018	0.941	5314	tags=62%, list=10%, signal=68%
GOMF_CALCIUM_DEPENDENT_PROTEIN_BINDING	GOMF_CALCIUM_DEPENDENT_PROTEIN_BINDING		79	0.421728	1.48366	0.0212766	0.454084	0.997	4334	tags=33%, list=8%, signal=36%
GOBP_EXTRACELLULAR_VESICLE_BIOGENESIS	GOBP_EXTRACELLULAR_VESICLE_BIOGENESIS	Details ...	22	0.585028	1.61947	0.0213592	0.398583	0.964	5327	tags=50%, list=10%, signal=55%
GOBP_PROTEIN_N_LINKED_GLYCOSYLATION	GOBP_PROTEIN_N_LINKED_GLYCOSYLATION		74	0.519002	1.58961	0.0216963	0.40674	0.98	6505	tags=46%, list=12%, signal=52%
GOBP_EPHRIN_RECEPTOR_SIGNALING_PATHWAY	GOBP_EPHRIN_RECEPTOR_SIGNALING_PATHWAY	Details ...	86	0.486164	1.60109	0.0218688	0.417379	0.974	7143	tags=49%, list=13%, signal=56%
GOCC_LATERAL_PLASMA_MEMBRANE	GOCC_LATERAL_PLASMA_MEMBRANE	Details ...	62	0.498141	1.5977	0.0222222	0.424597	0.976	6578	tags=52%, list=12%, signal=59%
GOBP_NEGATIVE_REGULATION_OF_APOPTOTIC_SIGNALING_PATHWAY	GOBP_NEGATIVE_REGULATION_OF_APOPTOTIC_SIGNALING_PATHWAY		222	0.416937	1.53663	0.0223124	0.416806	0.99	6752	tags=35%, list=12%, signal=40%
GOCC_FICOLIN_1_RICH_GRANULE_LUMEN	GOCC_FICOLIN_1_RICH_GRANULE_LUMEN	Details ...	124	0.501515	1.60772	0.0223577	0.402412	0.968	7339	tags=42%, list=13%, signal=48%
GOBP_INNATE_IMMUNE_RESPONSE_IN_MUCOSA	GOBP_INNATE_IMMUNE_RESPONSE_IN_MUCOSA	Details ...	27	0.603364	1.61561	0.0226337	0.389357	0.965	4647	tags=37%, list=8%, signal=40%
GOBP_AMP_METABOLIC_PROCESS	GOBP_AMP_METABOLIC_PROCESS	Details ...	16	0.610263	1.63027	0.0233918	0.383823	0.958	2563	tags=44%, list=5%, signal=46%
GOMF_DISULFIDE_OXIDOREDUCTASE_ACTIVITY	GOMF_DISULFIDE_OXIDOREDUCTASE_ACTIVITY	Details ...	39	0.55514	1.59502	0.0237624	0.41667	0.977	6895	tags=54%, list=12%, signal=61%
GOMF_LYSOPHOSPHOLIPID_ACYLTRANSFERASE_ACTIVITY	GOMF_LYSOPHOSPHOLIPID_ACYLTRANSFERASE_ACTIVITY	Details ...	21	0.605992	1.64064	0.0244399	0.367135	0.952	9165	tags=57%, list=17%, signal=68%
GOBP_NEGATIVE_REGULATION_OF_MEGAKARYOCYTE_DIFFERENTIATION	GOBP_NEGATIVE_REGULATION_OF_MEGAKARYOCYTE_DIFFERENTIATION	Details ...	18	0.677517	1.63023	0.0245747	0.379099	0.958	7023	tags=50%, list=13%, signal=57%
GOBP_PURINE_NUCLEOSIDE_METABOLIC_PROCESS	GOBP_PURINE_NUCLEOSIDE_METABOLIC_PROCESS		61	0.456834	1.55793	0.024948	0.413142	0.987	4935	tags=44%, list=9%, signal=49%
GOBP_INTERLEUKIN_1_MEDIATED_SIGNALING_PATHWAY	GOBP_INTERLEUKIN_1_MEDIATED_SIGNALING_PATHWAY		101	0.519603	1.59195	0.0251451	0.410753	0.98	5798	tags=48%, list=10%, signal=53%
GOMF_OXIDOREDUCTASE_ACTIVITY_ACTING_ON_THE_CH_CH_GROUP_OF_DONORS_NAD_OR_NADP_AS_ACCEPTOR	GOMF_OXIDOREDUCTASE_ACTIVITY_ACTING_ON_THE_CH_CH_GROUP_OF_DONORS_NAD_OR_NADP_AS_ACCEPTOR	Details ...	26	0.615711	1.64218	0.0253411	0.37175	0.952	7601	tags=54%, list=14%, signal=62%
GOCC_APICOLATERAL_PLASMA_MEMBRANE	GOCC_APICOLATERAL_PLASMA_MEMBRANE	Details ...	21	0.560433	1.59357	0.0254403	0.413392	0.978	6667	tags=57%, list=12%, signal=65%
GOBP_REGULATION_OF_CELLULAR_AMINO_ACID_METABOLIC_PROCESS	GOBP_REGULATION_OF_CELLULAR_AMINO_ACID_METABOLIC_PROCESS	Details ...	61	0.620266	1.64109	0.0255906	0.3708	0.952	6884	tags=61%, list=12%, signal=69%
GOBP_PROTEIN_MATURATION	GOBP_PROTEIN_MATURATION		292	0.347202	1.41105	0.0258964	0.495624	0.999	5858	tags=29%, list=11%, signal=32%
GOBP_REGULATION_OF_SPINDLE_ASSEMBLY	GOBP_REGULATION_OF_SPINDLE_ASSEMBLY	Details ...	25	0.646848	1.65946	0.0263692	0.355366	0.941	4427	tags=56%, list=8%, signal=61%
GOBP_REGULATION_OF_TRANSLATION_IN_RESPONSE_TO_STRESS	GOBP_REGULATION_OF_TRANSLATION_IN_RESPONSE_TO_STRESS	Details ...	21	0.660375	1.64236	0.0265306	0.376329	0.952	8706	tags=57%, list=16%, signal=68%
GOBP_POLARIZED_EPITHELIAL_CELL_DIFFERENTIATION	GOBP_POLARIZED_EPITHELIAL_CELL_DIFFERENTIATION		22	0.517783	1.53289	0.0271967	0.415048	0.99	6177	tags=45%, list=11%, signal=51%
GOBP_NEGATIVE_REGULATION_OF_CELL_CYCLE_G2_M_PHASE_TRANSITION	GOBP_NEGATIVE_REGULATION_OF_CELL_CYCLE_G2_M_PHASE_TRANSITION	Details ...	108	0.556683	1.65579	0.0275049	0.346239	0.942	6981	tags=52%, list=13%, signal=59%
GOBP_GLYCOLYTIC_PROCESS_THROUGH_FRUCTOSE_6_PHOSPHATE	GOBP_GLYCOLYTIC_PROCESS_THROUGH_FRUCTOSE_6_PHOSPHATE	Details ...	29	0.615839	1.65772	0.0279441	0.350218	0.941	2961	tags=45%, list=5%, signal=47%
GOBP_NEGATIVE_REGULATION_OF_EXTRINSIC_APOPTOTIC_SIGNALING_PATHWAY	GOBP_NEGATIVE_REGULATION_OF_EXTRINSIC_APOPTOTIC_SIGNALING_PATHWAY		103	0.453327	1.54459	0.0279441	0.406134	0.989	2869	tags=29%, list=5%, signal=31%
GOBP_POSITIVE_REGULATION_OF_VIRAL_LIFE_CYCLE	GOBP_POSITIVE_REGULATION_OF_VIRAL_LIFE_CYCLE	Details ...	32	0.593333	1.6546	0.028169	0.345319	0.942	7445	tags=56%, list=13%, signal=65%
GOBP_HYALURONAN_CATABOLIC_PROCESS	GOBP_HYALURONAN_CATABOLIC_PROCESS	Details ...	18	0.619753	1.61889	0.0293542	0.395768	0.964	3628	tags=50%, list=7%, signal=53%
GOBP_VIRION_ASSEMBLY	GOBP_VIRION_ASSEMBLY	Details ...	40	0.556803	1.59685	0.0294118	0.414394	0.976	5314	tags=48%, list=10%, signal=53%
GOBP_POSITIVE_REGULATION_OF_MEMBRANE_PERMEABILITY	GOBP_POSITIVE_REGULATION_OF_MEMBRANE_PERMEABILITY		65	0.475892	1.55589	0.0294118	0.407359	0.988	5015	tags=34%, list=9%, signal=37%
GOCC_ADHERENS_JUNCTION	GOCC_ADHERENS_JUNCTION		172	0.43487	1.52761	0.0301205	0.418693	0.99	6350	tags=39%, list=11%, signal=44%
GOCC_CELL_SUBSTRATE_JUNCTION	GOCC_CELL_SUBSTRATE_JUNCTION		423	0.452294	1.56542	0.0308008	0.417005	0.985	3728	tags=32%, list=7%, signal=34%
GOBP_ER_NUCLEUS_SIGNALING_PATHWAY	GOBP_ER_NUCLEUS_SIGNALING_PATHWAY	Details ...	53	0.571779	1.66688	0.0314465	0.3706	0.929	7818	tags=49%, list=14%, signal=57%
GOBP_PHOSPHATIDYLETHANOLAMINE_ACYL_CHAIN_REMODELING	GOBP_PHOSPHATIDYLETHANOLAMINE_ACYL_CHAIN_REMODELING		26	0.541737	1.55309	0.0316832	0.404757	0.988	4324	tags=46%, list=8%, signal=50%
GOBP_NUCLEOSIDE_MONOPHOSPHATE_METABOLIC_PROCESS	GOBP_NUCLEOSIDE_MONOPHOSPHATE_METABOLIC_PROCESS		75	0.487441	1.57375	0.032	0.420062	0.981	5024	tags=43%, list=9%, signal=47%
GOBP_GUANOSINE_CONTAINING_COMPOUND_METABOLIC_PROCESS	GOBP_GUANOSINE_CONTAINING_COMPOUND_METABOLIC_PROCESS		40	0.502758	1.588	0.0323232	0.408115	0.98	4819	tags=50%, list=9%, signal=55%
GOBP_NEGATIVE_REGULATION_OF_NECROTIC_CELL_DEATH	GOBP_NEGATIVE_REGULATION_OF_NECROTIC_CELL_DEATH		20	0.564813	1.54974	0.032381	0.406706	0.988	6449	tags=50%, list=12%, signal=57%
GOBP_PEPTIDYL_ASPARAGINE_MODIFICATION	GOBP_PEPTIDYL_ASPARAGINE_MODIFICATION		31	0.592465	1.58351	0.0325671	0.419658	0.98	6505	tags=48%, list=12%, signal=55%
GOBP_CORNIFICATION	GOBP_CORNIFICATION	Details ...	113	0.567834	1.63319	0.0326531	0.378427	0.955	7653	tags=49%, list=14%, signal=56%
GOCC_COPI_COATED_VESICLE	GOCC_COPI_COATED_VESICLE		28	0.59259	1.56744	0.0333333	0.41687	0.983	8825	tags=61%, list=16%, signal=72%
GOBP_DE_NOVO_PROTEIN_FOLDING	GOBP_DE_NOVO_PROTEIN_FOLDING		43	0.567102	1.54729	0.0336842	0.405956	0.989	8477	tags=49%, list=15%, signal=58%
GOBP_ANTIBACTERIAL_HUMORAL_RESPONSE	GOBP_ANTIBACTERIAL_HUMORAL_RESPONSE		61	0.474974	1.51657	0.034749	0.420889	0.992	5752	tags=36%, list=10%, signal=40%
GOBP_POSITIVE_REGULATION_OF_TELOMERASE_RNA_LOCALIZATION_TO_CAJAL_BODY	GOBP_POSITIVE_REGULATION_OF_TELOMERASE_RNA_LOCALIZATION_TO_CAJAL_BODY		15	0.761776	1.58256	0.0349076	0.415276	0.98	7996	tags=67%, list=14%, signal=78%
GOBP_PROTEIN_LOCALIZATION_TO_CELL_CELL_JUNCTION	GOBP_PROTEIN_LOCALIZATION_TO_CELL_CELL_JUNCTION		21	0.621065	1.54981	0.035124	0.409342	0.988	3187	tags=52%, list=6%, signal=56%
GOCC_ENDOPLASMIC_RETICULUM_QUALITY_CONTROL_COMPARTMENT	GOCC_ENDOPLASMIC_RETICULUM_QUALITY_CONTROL_COMPARTMENT		26	0.576511	1.5631	0.0357853	0.417952	0.985	8289	tags=54%, list=15%, signal=63%
GOMF_ENDOPEPTIDASE_REGULATOR_ACTIVITY	GOMF_ENDOPEPTIDASE_REGULATOR_ACTIVITY		190	0.338836	1.36755	0.0366089	0.503416	0.999	7535	tags=36%, list=14%, signal=41%
GOBP_APOPTOTIC_MITOCHONDRIAL_CHANGES	GOBP_APOPTOTIC_MITOCHONDRIAL_CHANGES		114	0.428817	1.48304	0.0368217	0.449601	0.997	8875	tags=45%, list=16%, signal=53%
GOMF_WIDE_PORE_CHANNEL_ACTIVITY	GOMF_WIDE_PORE_CHANNEL_ACTIVITY		30	0.483455	1.50382	0.0373281	0.432077	0.992	1312	tags=27%, list=2%, signal=27%
GOBP_REGULATION_OF_HEMATOPOIETIC_STEM_CELL_DIFFERENTIATION	GOBP_REGULATION_OF_HEMATOPOIETIC_STEM_CELL_DIFFERENTIATION	Details ...	74	0.573861	1.63505	0.0374753	0.381988	0.953	6916	tags=59%, list=13%, signal=68%
GOMF_ACYLGLYCEROL_O_ACYLTRANSFERASE_ACTIVITY	GOMF_ACYLGLYCEROL_O_ACYLTRANSFERASE_ACTIVITY		25	0.563064	1.5678	0.0375494	0.419155	0.983	9165	tags=52%, list=17%, signal=62%
GOBP_REGULATION_OF_STEM_CELL_DIFFERENTIATION	GOBP_REGULATION_OF_STEM_CELL_DIFFERENTIATION		111	0.500315	1.56922	0.0376238	0.424754	0.983	7110	tags=50%, list=13%, signal=58%
GOBP_CELL_REDOX_HOMEOSTASIS	GOBP_CELL_REDOX_HOMEOSTASIS		43	0.506253	1.56575	0.0376984	0.419357	0.985	4237	tags=40%, list=8%, signal=43%
GOBP_PROTEASOMAL_UBIQUITIN_INDEPENDENT_PROTEIN_CATABOLIC_PROCESS	GOBP_PROTEASOMAL_UBIQUITIN_INDEPENDENT_PROTEIN_CATABOLIC_PROCESS		22	0.703714	1.5647	0.0376984	0.416186	0.985	6326	tags=77%, list=11%, signal=87%
GOMF_EXOGENOUS_PROTEIN_BINDING	GOMF_EXOGENOUS_PROTEIN_BINDING		77	0.445938	1.4923	0.0379747	0.44074	0.994	5740	tags=38%, list=10%, signal=42%
GOBP_CELLULAR_MODIFIED_AMINO_ACID_BIOSYNTHETIC_PROCESS	GOBP_CELLULAR_MODIFIED_AMINO_ACID_BIOSYNTHETIC_PROCESS		48	0.479841	1.50832	0.0381526	0.425108	0.992	5124	tags=42%, list=9%, signal=46%
GOMF_DRUG_BINDING	GOMF_DRUG_BINDING		61	0.411369	1.42905	0.0383838	0.490679	0.998	4054	tags=31%, list=7%, signal=34%
GOBP_REGULATION_OF_PROTEIN_EXPORT_FROM_NUCLEUS	GOBP_REGULATION_OF_PROTEIN_EXPORT_FROM_NUCLEUS		32	0.524614	1.49731	0.0384615	0.434203	0.993	5173	tags=41%, list=9%, signal=45%
GOMF_STEROID_DEHYDROGENASE_ACTIVITY	GOMF_STEROID_DEHYDROGENASE_ACTIVITY		34	0.524803	1.53319	0.0389105	0.416601	0.99	7105	tags=44%, list=13%, signal=51%
GOBP_NUCLEOSIDE_SALVAGE	GOBP_NUCLEOSIDE_SALVAGE		16	0.625909	1.57827	0.0390625	0.42682	0.98	4935	tags=63%, list=9%, signal=69%
GOBP_KERATINIZATION	GOBP_KERATINIZATION		224	0.451673	1.52818	0.0392927	0.419505	0.99	7653	tags=29%, list=14%, signal=34%
GOBP_REGULATION_OF_KERATINOCYTE_PROLIFERATION	GOBP_REGULATION_OF_KERATINOCYTE_PROLIFERATION		36	0.509449	1.52327	0.0395257	0.427384	0.991	3053	tags=36%, list=6%, signal=38%
GOBP_REGULATION_OF_INTRINSIC_APOPTOTIC_SIGNALING_PATHWAY	GOBP_REGULATION_OF_INTRINSIC_APOPTOTIC_SIGNALING_PATHWAY		157	0.406756	1.48336	0.040153	0.452871	0.997	8636	tags=44%, list=16%, signal=52%
GOBP_LATE_ENDOSOME_TO_VACUOLE_TRANSPORT_VIA_MULTIVESICULAR_BODY_SORTING_PATHWAY	GOBP_LATE_ENDOSOME_TO_VACUOLE_TRANSPORT_VIA_MULTIVESICULAR_BODY_SORTING_PATHWAY		17	0.624897	1.55935	0.0403846	0.417659	0.986	5364	tags=47%, list=10%, signal=52%
GOBP_PROTEIN_INSERTION_INTO_MITOCHONDRIAL_MEMBRANE_INVOLVED_IN_APOPTOTIC_SIGNALING_PATHWAY	GOBP_PROTEIN_INSERTION_INTO_MITOCHONDRIAL_MEMBRANE_INVOLVED_IN_APOPTOTIC_SIGNALING_PATHWAY		30	0.550499	1.56864	0.040404	0.423265	0.983	4120	tags=43%, list=7%, signal=47%
GOBP_POSITIVE_REGULATION_OF_MITOCHONDRION_ORGANIZATION	GOBP_POSITIVE_REGULATION_OF_MITOCHONDRION_ORGANIZATION		83	0.444879	1.50251	0.040404	0.433787	0.992	4120	tags=33%, list=7%, signal=35%
GOCC_CELL_CELL_JUNCTION	GOCC_CELL_CELL_JUNCTION		484	0.381962	1.46068	0.040404	0.477873	0.997	6183	tags=37%, list=11%, signal=41%
GOBP_TERPENOID_BIOSYNTHETIC_PROCESS	GOBP_TERPENOID_BIOSYNTHETIC_PROCESS		15	0.615602	1.56855	0.0410959	0.42004	0.983	9739	tags=60%, list=18%, signal=73%
GOCC_APICAL_JUNCTION_COMPLEX	GOCC_APICAL_JUNCTION_COMPLEX		137	0.468974	1.55715	0.0411523	0.409451	0.987	6449	tags=43%, list=12%, signal=49%
GOBP_POSITIVE_REGULATION_OF_PROTEIN_MATURATION	GOBP_POSITIVE_REGULATION_OF_PROTEIN_MATURATION		26	0.489152	1.48391	0.0411765	0.455627	0.997	3091	tags=35%, list=6%, signal=37%
GOBP_GLUCOSE_CATABOLIC_PROCESS	GOBP_GLUCOSE_CATABOLIC_PROCESS		36	0.547216	1.5754	0.0423387	0.421868	0.98	2961	tags=36%, list=5%, signal=38%
GOBP_GLUCOSE_6_PHOSPHATE_METABOLIC_PROCESS	GOBP_GLUCOSE_6_PHOSPHATE_METABOLIC_PROCESS		25	0.554288	1.55821	0.0425963	0.415512	0.987	4248	tags=44%, list=8%, signal=48%
GOBP_NADPH_REGENERATION	GOBP_NADPH_REGENERATION		18	0.615435	1.52354	0.0432099	0.429077	0.991	5884	tags=50%, list=11%, signal=56%
GOBP_ENDOSOME_ORGANIZATION	GOBP_ENDOSOME_ORGANIZATION		80	0.509025	1.52225	0.0439331	0.425582	0.991	6459	tags=45%, list=12%, signal=51%
GOMF_LYSOPHOSPHATIDIC_ACID_ACYLTRANSFERASE_ACTIVITY	GOMF_LYSOPHOSPHATIDIC_ACID_ACYLTRANSFERASE_ACTIVITY		18	0.589029	1.57493	0.0440882	0.419806	0.98	9165	tags=56%, list=17%, signal=67%
GOCC_TIGHT_JUNCTION	GOCC_TIGHT_JUNCTION		124	0.448926	1.51358	0.0440882	0.420556	0.992	6668	tags=43%, list=12%, signal=48%
GOBP_RIBONUCLEOSIDE_MONOPHOSPHATE_METABOLIC_PROCESS	GOBP_RIBONUCLEOSIDE_MONOPHOSPHATE_METABOLIC_PROCESS		56	0.508804	1.55881	0.0448065	0.416441	0.987	4770	tags=45%, list=9%, signal=49%
GOBP_INTERMEDIATE_FILAMENT_BASED_PROCESS	GOBP_INTERMEDIATE_FILAMENT_BASED_PROCESS		51	0.440983	1.43111	0.045098	0.49193	0.998	5359	tags=35%, list=10%, signal=39%
GOBP_REGULATION_OF_CELLULAR_AMINE_METABOLIC_PROCESS	GOBP_REGULATION_OF_CELLULAR_AMINE_METABOLIC_PROCESS		76	0.521857	1.51504	0.0451866	0.421003	0.992	6326	tags=51%, list=11%, signal=58%
GOCC_SPINDLE_POLE_CENTROSOME	GOCC_SPINDLE_POLE_CENTROSOME		15	0.678133	1.55974	0.0455487	0.419445	0.986	5285	tags=53%, list=10%, signal=59%
GOMF_CYSTEINE_TYPE_ENDOPEPTIDASE_INHIBITOR_ACTIVITY	GOMF_CYSTEINE_TYPE_ENDOPEPTIDASE_INHIBITOR_ACTIVITY		56	0.443946	1.47631	0.0458015	0.458854	0.997	7535	tags=45%, list=14%, signal=52%
GOBP_CELLULAR_RESPONSE_TO_DSRNA	GOBP_CELLULAR_RESPONSE_TO_DSRNA		22	0.573488	1.57042	0.046	0.427841	0.983	6108	tags=50%, list=11%, signal=56%
GOMF_INTRAMOLECULAR_TRANSFERASE_ACTIVITY	GOMF_INTRAMOLECULAR_TRANSFERASE_ACTIVITY		27	0.547182	1.52868	0.0460251	0.42062	0.99	7254	tags=44%, list=13%, signal=51%
GOMF_INTERMEDIATE_FILAMENT_BINDING	GOMF_INTERMEDIATE_FILAMENT_BINDING		15	0.581753	1.48027	0.0462428	0.453498	0.997	5359	tags=47%, list=10%, signal=52%
GOBP_VIRAL_BUDDING	GOBP_VIRAL_BUDDING		26	0.584108	1.57022	0.046332	0.424967	0.983	5314	tags=54%, list=10%, signal=60%
GOBP_REGULATION_OF_EPIDERMIS_DEVELOPMENT	GOBP_REGULATION_OF_EPIDERMIS_DEVELOPMENT		69	0.436496	1.44551	0.0474227	0.490519	0.997	6999	tags=42%, list=13%, signal=48%
GOBP_REGULATION_OF_HAIR_CYCLE	GOBP_REGULATION_OF_HAIR_CYCLE		26	0.48016	1.45158	0.0478088	0.493915	0.997	5035	tags=35%, list=9%, signal=38%
GOMF_UNFOLDED_PROTEIN_BINDING	GOMF_UNFOLDED_PROTEIN_BINDING		119	0.479723	1.49816	0.047817	0.436039	0.993	8539	tags=49%, list=15%, signal=58%
GOMF_INTRAMOLECULAR_OXIDOREDUCTASE_ACTIVITY	GOMF_INTRAMOLECULAR_OXIDOREDUCTASE_ACTIVITY		50	0.43438	1.44144	0.0481696	0.483978	0.998	7313	tags=42%, list=13%, signal=48%
GOBP_POSITIVE_REGULATION_OF_CELLULAR_PROTEIN_LOCALIZATION	GOBP_POSITIVE_REGULATION_OF_CELLULAR_PROTEIN_LOCALIZATION		294	0.401884	1.44255	0.0483871	0.484208	0.998	5530	tags=33%, list=10%, signal=37%
GOBP_MITOTIC_SPINDLE_ASSEMBLY	GOBP_MITOTIC_SPINDLE_ASSEMBLY	Details ...	65	0.564999	1.59699	0.048583	0.418206	0.976	4433	tags=40%, list=8%, signal=43%
GOBP_INTEGRATED_STRESS_RESPONSE_SIGNALING	GOBP_INTEGRATED_STRESS_RESPONSE_SIGNALING		27	0.573085	1.56225	0.0491803	0.417512	0.985	8706	tags=52%, list=16%, signal=62%
GOBP_DEOXYRIBONUCLEOTIDE_BIOSYNTHETIC_PROCESS	GOBP_DEOXYRIBONUCLEOTIDE_BIOSYNTHETIC_PROCESS		15	0.613886	1.54228	0.0493097	0.410504	0.989	5024	tags=60%, list=9%, signal=66%
GOBP_REGULATION_OF_SUBSTRATE_ADHESION_DEPENDENT_CELL_SPREADING	GOBP_REGULATION_OF_SUBSTRATE_ADHESION_DEPENDENT_CELL_SPREADING		57	0.465635	1.46516	0.0493827	0.470371	0.997	3635	tags=33%, list=7%, signal=36%
GOBP_GMP_METABOLIC_PROCESS	GOBP_GMP_METABOLIC_PROCESS		15	0.607637	1.55448	0.0496894	0.403345	0.988	4735	tags=67%, list=9%, signal=73%
GOBP_NUCLEOSIDE_METABOLIC_PROCESS	GOBP_NUCLEOSIDE_METABOLIC_PROCESS		104	0.410703	1.4468	0.0499002	0.494431	0.997	4935	tags=38%, list=9%, signal=41%
GOBP_CELL_CELL_SIGNALING_INVOLVED_IN_CARDIAC_CONDUCTION	GOBP_CELL_CELL_SIGNALING_INVOLVED_IN_CARDIAC_CONDUCTION	Details ...	33	-0.663839	-1.95405	0	0.483928	0.201	6846	tags=55%, list=12%, signal=62%
GOMF_VOLTAGE_GATED_CATION_CHANNEL_ACTIVITY	GOMF_VOLTAGE_GATED_CATION_CHANNEL_ACTIVITY	Details ...	139	-0.59322	-1.94857	0	0.270083	0.213	11260	tags=58%, list=20%, signal=72%
GOBP_POSITIVE_REGULATION_OF_SYNAPTIC_TRANSMISSION_GLUTAMATERGIC	GOBP_POSITIVE_REGULATION_OF_SYNAPTIC_TRANSMISSION_GLUTAMATERGIC	Details ...	30	-0.720935	-1.93252	0	0.241415	0.259	7602	tags=60%, list=14%, signal=70%
GOBP_MEMBRANE_DEPOLARIZATION_DURING_ACTION_POTENTIAL	GOBP_MEMBRANE_DEPOLARIZATION_DURING_ACTION_POTENTIAL	Details ...	36	-0.719837	-1.90588	0	0.229186	0.332	9394	tags=75%, list=17%, signal=90%
GOMF_VOLTAGE_GATED_POTASSIUM_CHANNEL_ACTIVITY	GOMF_VOLTAGE_GATED_POTASSIUM_CHANNEL_ACTIVITY	Details ...	87	-0.602256	-1.8897	0	0.244256	0.372	10517	tags=59%, list=19%, signal=72%
GOCC_VOLTAGE_GATED_SODIUM_CHANNEL_COMPLEX	GOCC_VOLTAGE_GATED_SODIUM_CHANNEL_COMPLEX	Details ...	17	-0.799076	-1.88265	0	0.233907	0.387	7330	tags=82%, list=13%, signal=95%
GOBP_NEUROMUSCULAR_SYNAPTIC_TRANSMISSION	GOBP_NEUROMUSCULAR_SYNAPTIC_TRANSMISSION	Details ...	24	-0.6797	-1.86575	0	0.266578	0.437	14016	tags=71%, list=25%, signal=95%
GOMF_VOLTAGE_GATED_ION_CHANNEL_ACTIVITY	GOMF_VOLTAGE_GATED_ION_CHANNEL_ACTIVITY	Details ...	197	-0.531865	-1.86525	0	0.239182	0.442	9588	tags=50%, list=17%, signal=60%
GOBP_CGMP_MEDIATED_SIGNALING	GOBP_CGMP_MEDIATED_SIGNALING	Details ...	29	-0.656706	-1.85869	0	0.236205	0.467	7602	tags=48%, list=14%, signal=56%
GOBP_CARDIAC_MUSCLE_CELL_MEMBRANE_REPOLARIZATION	GOBP_CARDIAC_MUSCLE_CELL_MEMBRANE_REPOLARIZATION	Details ...	36	-0.601914	-1.85707	0	0.21907	0.468	9394	tags=53%, list=17%, signal=64%
GOBP_CYCLIC_NUCLEOTIDE_MEDIATED_SIGNALING	GOBP_CYCLIC_NUCLEOTIDE_MEDIATED_SIGNALING	Details ...	88	-0.558747	-1.8552	0	0.206173	0.473	11133	tags=49%, list=20%, signal=61%
GOBP_POSITIVE_REGULATION_OF_CATION_CHANNEL_ACTIVITY	GOBP_POSITIVE_REGULATION_OF_CATION_CHANNEL_ACTIVITY	Details ...	71	-0.561246	-1.84899	0	0.21049	0.491	6440	tags=39%, list=12%, signal=45%
GOMF_VOLTAGE_GATED_CALCIUM_CHANNEL_ACTIVITY	GOMF_VOLTAGE_GATED_CALCIUM_CHANNEL_ACTIVITY	Details ...	44	-0.620926	-1.84884	0	0.196098	0.491	6213	tags=48%, list=11%, signal=54%
GOMF_VOLTAGE_GATED_SODIUM_CHANNEL_ACTIVITY	GOMF_VOLTAGE_GATED_SODIUM_CHANNEL_ACTIVITY	Details ...	23	-0.750212	-1.8414	0	0.208029	0.514	8087	tags=78%, list=15%, signal=92%
GOBP_NEURONAL_ACTION_POTENTIAL	GOBP_NEURONAL_ACTION_POTENTIAL	Details ...	33	-0.633803	-1.84061	0	0.197719	0.518	7330	tags=52%, list=13%, signal=59%
GOCC_CATION_CHANNEL_COMPLEX	GOCC_CATION_CHANNEL_COMPLEX	Details ...	222	-0.547811	-1.83127	0	0.190519	0.547	9731	tags=51%, list=18%, signal=62%
GOMF_PEPTIDE_RECEPTOR_ACTIVITY	GOMF_PEPTIDE_RECEPTOR_ACTIVITY	Details ...	151	-0.533314	-1.82812	0	0.189804	0.558	11811	tags=52%, list=21%, signal=65%
GOBP_POSITIVE_REGULATION_OF_VOLTAGE_GATED_POTASSIUM_CHANNEL_ACTIVITY	GOBP_POSITIVE_REGULATION_OF_VOLTAGE_GATED_POTASSIUM_CHANNEL_ACTIVITY	Details ...	15	-0.695855	-1.82369	0	0.183139	0.57	5967	tags=47%, list=11%, signal=52%
GOMF_SODIUM_CHANNEL_ACTIVITY	GOMF_SODIUM_CHANNEL_ACTIVITY	Details ...	43	-0.64416	-1.81289	0	0.204903	0.608	11653	tags=70%, list=21%, signal=88%
GOMF_GATED_CHANNEL_ACTIVITY	GOMF_GATED_CHANNEL_ACTIVITY	Details ...	337	-0.493928	-1.80443	0	0.196888	0.633	11260	tags=49%, list=20%, signal=61%
GOBP_ADENYLATE_CYCLASE_MODULATING_G_PROTEIN_COUPLED_RECEPTOR_SIGNALING_PATHWAY	GOBP_ADENYLATE_CYCLASE_MODULATING_G_PROTEIN_COUPLED_RECEPTOR_SIGNALING_PATHWAY	Details ...	229	-0.522142	-1.80426	0	0.190442	0.634	10892	tags=48%, list=20%, signal=59%
GOCC_SODIUM_CHANNEL_COMPLEX	GOCC_SODIUM_CHANNEL_COMPLEX	Details ...	26	-0.6716	-1.79476	0	0.198128	0.666	8238	tags=62%, list=15%, signal=72%
GOBP_PROTEIN_KINASE_A_SIGNALING	GOBP_PROTEIN_KINASE_A_SIGNALING	Details ...	37	-0.583792	-1.79472	0	0.191987	0.666	12201	tags=59%, list=22%, signal=76%
GOBP_CARDIAC_MUSCLE_CONTRACTION	GOBP_CARDIAC_MUSCLE_CONTRACTION	Details ...	134	-0.488507	-1.78811	0	0.198772	0.686	9731	tags=43%, list=18%, signal=52%
GOBP_MULTICELLULAR_ORGANISMAL_SIGNALING	GOBP_MULTICELLULAR_ORGANISMAL_SIGNALING	Details ...	202	-0.513176	-1.78598	0	0.198841	0.689	7330	tags=43%, list=13%, signal=49%
GOBP_ACTION_POTENTIAL	GOBP_ACTION_POTENTIAL	Details ...	134	-0.510648	-1.78549	0	0.194952	0.69	9033	tags=46%, list=16%, signal=54%
GOBP_G_PROTEIN_COUPLED_RECEPTOR_SIGNALING_PATHWAY_COUPLED_TO_CYCLIC_NUCLEOTIDE_SECOND_MESSENGER	GOBP_G_PROTEIN_COUPLED_RECEPTOR_SIGNALING_PATHWAY_COUPLED_TO_CYCLIC_NUCLEOTIDE_SECOND_MESSENGER	Details ...	67	-0.532609	-1.78021	0	0.192455	0.706	12997	tags=57%, list=23%, signal=74%
GOBP_REGULATION_OF_RESPONSE_TO_FOOD	GOBP_REGULATION_OF_RESPONSE_TO_FOOD	Details ...	19	-0.676955	-1.77598	0	0.193334	0.715	12015	tags=68%, list=22%, signal=87%
GOMF_POTASSIUM_ION_TRANSMEMBRANE_TRANSPORTER_ACTIVITY	GOMF_POTASSIUM_ION_TRANSMEMBRANE_TRANSPORTER_ACTIVITY	Details ...	152	-0.514192	-1.7688	0	0.202498	0.743	11957	tags=51%, list=22%, signal=65%
GOBP_REGULATION_OF_CAMP_MEDIATED_SIGNALING	GOBP_REGULATION_OF_CAMP_MEDIATED_SIGNALING	Details ...	37	-0.588841	-1.76657	0	0.199339	0.747	10610	tags=49%, list=19%, signal=60%
GOCC_VOLTAGE_GATED_CALCIUM_CHANNEL_COMPLEX	GOCC_VOLTAGE_GATED_CALCIUM_CHANNEL_COMPLEX	Details ...	43	-0.586031	-1.75909	0	0.194537	0.763	9731	tags=51%, list=18%, signal=62%
GOBP_SECOND_MESSENGER_MEDIATED_SIGNALING	GOBP_SECOND_MESSENGER_MEDIATED_SIGNALING	Details ...	305	-0.490937	-1.75725	0	0.19516	0.766	11289	tags=47%, list=20%, signal=59%
GOBP_REGULATION_OF_POSTSYNAPTIC_MEMBRANE_POTENTIAL	GOBP_REGULATION_OF_POSTSYNAPTIC_MEMBRANE_POTENTIAL	Details ...	136	-0.55178	-1.75687	0	0.192475	0.77	10990	tags=53%, list=20%, signal=66%
GOBP_POTASSIUM_ION_TRANSPORT	GOBP_POTASSIUM_ION_TRANSPORT	Details ...	230	-0.479809	-1.75525	0	0.189362	0.773	9512	tags=43%, list=17%, signal=52%
GOMF_EXCITATORY_EXTRACELLULAR_LIGAND_GATED_ION_CHANNEL_ACTIVITY	GOMF_EXCITATORY_EXTRACELLULAR_LIGAND_GATED_ION_CHANNEL_ACTIVITY	Details ...	29	-0.624343	-1.75468	0	0.187309	0.776	16505	tags=76%, list=30%, signal=108%
GOBP_RESPONSE_TO_DIETARY_EXCESS	GOBP_RESPONSE_TO_DIETARY_EXCESS	Details ...	23	-0.603558	-1.75294	0	0.187749	0.778	10610	tags=52%, list=19%, signal=65%
GOBP_INHIBITORY_SYNAPSE_ASSEMBLY	GOBP_INHIBITORY_SYNAPSE_ASSEMBLY	Details ...	16	-0.716865	-1.7502	0	0.190972	0.785	7415	tags=75%, list=13%, signal=87%
GOBP_REGULATION_OF_SYNAPTIC_TRANSMISSION_GLUTAMATERGIC	GOBP_REGULATION_OF_SYNAPTIC_TRANSMISSION_GLUTAMATERGIC	Details ...	68	-0.586945	-1.74717	0	0.191927	0.789	8238	tags=50%, list=15%, signal=59%
GOMF_EXTRACELLULAR_LIGAND_GATED_ION_CHANNEL_ACTIVITY	GOMF_EXTRACELLULAR_LIGAND_GATED_ION_CHANNEL_ACTIVITY	Details ...	73	-0.559163	-1.74466	0	0.191372	0.795	16505	tags=66%, list=30%, signal=94%
GOMF_CATION_CHANNEL_ACTIVITY	GOMF_CATION_CHANNEL_ACTIVITY	Details ...	333	-0.480349	-1.7441	0	0.189662	0.797	11307	tags=47%, list=20%, signal=59%
GOBP_REGULATION_OF_CATION_TRANSMEMBRANE_TRANSPORT	GOBP_REGULATION_OF_CATION_TRANSMEMBRANE_TRANSPORT	Details ...	338	-0.461043	-1.72691	0	0.212667	0.832	10806	tags=43%, list=20%, signal=53%
GOBP_POSITIVE_REGULATION_OF_CATION_TRANSMEMBRANE_TRANSPORT	GOBP_POSITIVE_REGULATION_OF_CATION_TRANSMEMBRANE_TRANSPORT	Details ...	140	-0.465467	-1.72232	0	0.211179	0.834	10561	tags=43%, list=19%, signal=53%
GOMF_LIGAND_GATED_ION_CHANNEL_ACTIVITY	GOMF_LIGAND_GATED_ION_CHANNEL_ACTIVITY	Details ...	139	-0.510847	-1.70663	0	0.219581	0.873	14189	tags=55%, list=26%, signal=73%
GOMF_LIGAND_GATED_CATION_CHANNEL_ACTIVITY	GOMF_LIGAND_GATED_CATION_CHANNEL_ACTIVITY	Details ...	109	-0.514861	-1.6951	0	0.218656	0.885	14189	tags=55%, list=26%, signal=74%
GOCC_PHOTORECEPTOR_OUTER_SEGMENT	GOCC_PHOTORECEPTOR_OUTER_SEGMENT	Details ...	88	-0.477437	-1.69432	0	0.218172	0.886	11103	tags=39%, list=20%, signal=48%
GOCC_9PLUS0_NON_MOTILE_CILIUM	GOCC_9PLUS0_NON_MOTILE_CILIUM		125	-0.479482	-1.6783	0	0.211342	0.902	9873	tags=36%, list=18%, signal=44%
GOBP_INORGANIC_ION_IMPORT_ACROSS_PLASMA_MEMBRANE	GOBP_INORGANIC_ION_IMPORT_ACROSS_PLASMA_MEMBRANE		97	-0.464543	-1.67471	0	0.208778	0.905	7805	tags=35%, list=14%, signal=41%
GOCC_NON_MOTILE_CILIUM	GOCC_NON_MOTILE_CILIUM		159	-0.481734	-1.66562	0	0.202876	0.914	10694	tags=38%, list=19%, signal=47%
GOMF_PASSIVE_TRANSMEMBRANE_TRANSPORTER_ACTIVITY	GOMF_PASSIVE_TRANSMEMBRANE_TRANSPORTER_ACTIVITY		477	-0.417814	-1.62543	0	0.222986	0.952	11307	tags=42%, list=20%, signal=52%
GOBP_METAL_ION_TRANSPORT	GOBP_METAL_ION_TRANSPORT		482	-0.402294	-1.57624	0	0.251358	0.978	10561	tags=39%, list=19%, signal=48%
GOBP_POTASSIUM_ION_IMPORT_ACROSS_PLASMA_MEMBRANE	GOBP_POTASSIUM_ION_IMPORT_ACROSS_PLASMA_MEMBRANE	Details ...	47	-0.576314	-1.82577	0.00184502	0.186974	0.563	9873	tags=51%, list=18%, signal=62%
GOBP_VENTRICULAR_CARDIAC_MUSCLE_CELL_MEMBRANE_REPOLARIZATION	GOBP_VENTRICULAR_CARDIAC_MUSCLE_CELL_MEMBRANE_REPOLARIZATION	Details ...	25	-0.622019	-1.80742	0.00185874	0.20359	0.623	8836	tags=52%, list=16%, signal=62%
GOBP_ADENYLATE_CYCLASE_ACTIVATING_G_PROTEIN_COUPLED_RECEPTOR_SIGNALING_PATHWAY	GOBP_ADENYLATE_CYCLASE_ACTIVATING_G_PROTEIN_COUPLED_RECEPTOR_SIGNALING_PATHWAY	Details ...	142	-0.52585	-1.78499	0.00186916	0.190912	0.693	10892	tags=49%, list=20%, signal=61%
GOBP_LOCOMOTORY_BEHAVIOR	GOBP_LOCOMOTORY_BEHAVIOR	Details ...	161	-0.515808	-1.70689	0.00187617	0.22154	0.873	9610	tags=44%, list=17%, signal=53%
GOBP_CALCIUM_ION_IMPORT_INTO_CYTOSOL	GOBP_CALCIUM_ION_IMPORT_INTO_CYTOSOL	Details ...	21	-0.618847	-1.70037	0.00187617	0.222316	0.876	6386	tags=48%, list=12%, signal=54%
GOBP_REGULATION_OF_CAMP_DEPENDENT_PROTEIN_KINASE_ACTIVITY	GOBP_REGULATION_OF_CAMP_DEPENDENT_PROTEIN_KINASE_ACTIVITY	Details ...	20	-0.679827	-1.69559	0.00188679	0.222248	0.885	6961	tags=55%, list=13%, signal=63%
GOBP_REGULATION_OF_BLOOD_CIRCULATION	GOBP_REGULATION_OF_BLOOD_CIRCULATION	Details ...	285	-0.466121	-1.70399	0.00189753	0.221148	0.874	11872	tags=47%, list=21%, signal=59%
GOBP_CARDIAC_CONDUCTION	GOBP_CARDIAC_CONDUCTION	Details ...	148	-0.504825	-1.73338	0.00190476	0.202883	0.816	7081	tags=42%, list=13%, signal=48%
GOBP_REGULATION_OF_MEMBRANE_POTENTIAL	GOBP_REGULATION_OF_MEMBRANE_POTENTIAL	Details ...	430	-0.46634	-1.69993	0.0019084	0.218513	0.877	9609	tags=42%, list=17%, signal=51%
GOBP_CALCIUM_ION_IMPORT	GOBP_CALCIUM_ION_IMPORT		82	-0.472062	-1.68639	0.0019084	0.211636	0.894	8397	tags=40%, list=15%, signal=47%
GOBP_CALCIUM_ION_TRANSMEMBRANE_TRANSPORT	GOBP_CALCIUM_ION_TRANSMEMBRANE_TRANSPORT		302	-0.416065	-1.57376	0.0019084	0.248692	0.978	7955	tags=36%, list=14%, signal=42%
GOBP_CHEMICAL_SYNAPTIC_TRANSMISSION_POSTSYNAPTIC	GOBP_CHEMICAL_SYNAPTIC_TRANSMISSION_POSTSYNAPTIC	Details ...	105	-0.558118	-1.76376	0.00191205	0.202534	0.752	9041	tags=49%, list=16%, signal=58%
GOBP_REGULATION_OF_CARDIAC_MUSCLE_CELL_MEMBRANE_REPOLARIZATION	GOBP_REGULATION_OF_CARDIAC_MUSCLE_CELL_MEMBRANE_REPOLARIZATION	Details ...	26	-0.605854	-1.76872	0.00191571	0.198176	0.743	8836	tags=46%, list=16%, signal=55%
GOCC_CALCIUM_CHANNEL_COMPLEX	GOCC_CALCIUM_CHANNEL_COMPLEX	Details ...	68	-0.529224	-1.72494	0.00191571	0.213921	0.833	7865	tags=44%, list=14%, signal=51%
GOBP_CALCIUM_ION_TRANSPORT	GOBP_CALCIUM_ION_TRANSPORT		405	-0.426961	-1.64435	0.00191571	0.210851	0.937	11307	tags=43%, list=20%, signal=54%
GOBP_ADENYLATE_CYCLASE_INHIBITING_G_PROTEIN_COUPLED_RECEPTOR_SIGNALING_PATHWAY	GOBP_ADENYLATE_CYCLASE_INHIBITING_G_PROTEIN_COUPLED_RECEPTOR_SIGNALING_PATHWAY	Details ...	84	-0.546727	-1.73863	0.00192308	0.196451	0.805	6946	tags=40%, list=13%, signal=46%
GOBP_SODIUM_ION_TRANSPORT	GOBP_SODIUM_ION_TRANSPORT		239	-0.42313	-1.61241	0.0019305	0.232003	0.963	11957	tags=44%, list=22%, signal=56%
GOMF_POTASSIUM_CHANNEL_ACTIVITY	GOMF_POTASSIUM_CHANNEL_ACTIVITY	Details ...	120	-0.555831	-1.81158	0.00193424	0.19998	0.61	11695	tags=57%, list=21%, signal=72%
GOMF_SODIUM_CHANNEL_REGULATOR_ACTIVITY	GOMF_SODIUM_CHANNEL_REGULATOR_ACTIVITY	Details ...	39	-0.548069	-1.75605	0.00193424	0.190854	0.771	6762	tags=44%, list=12%, signal=50%
GOMF_DELAYED_RECTIFIER_POTASSIUM_CHANNEL_ACTIVITY	GOMF_DELAYED_RECTIFIER_POTASSIUM_CHANNEL_ACTIVITY	Details ...	33	-0.586361	-1.72317	0.00193424	0.212004	0.834	9451	tags=55%, list=17%, signal=66%
GOBP_SYNAPTIC_TRANSMISSION_GLUTAMATERGIC	GOBP_SYNAPTIC_TRANSMISSION_GLUTAMATERGIC	Details ...	89	-0.598549	-1.79692	0.00194175	0.198442	0.662	8238	tags=52%, list=15%, signal=61%
GOBP_CYCLIC_NUCLEOTIDE_BIOSYNTHETIC_PROCESS	GOBP_CYCLIC_NUCLEOTIDE_BIOSYNTHETIC_PROCESS	Details ...	22	-0.666282	-1.75927	0.00194175	0.198015	0.763	15999	tags=77%, list=29%, signal=109%
GOMF_CAMP_BINDING	GOMF_CAMP_BINDING	Details ...	23	-0.678263	-1.71657	0.00194932	0.213417	0.847	11663	tags=70%, list=21%, signal=88%
GOBP_RESPIRATORY_SYSTEM_PROCESS	GOBP_RESPIRATORY_SYSTEM_PROCESS	Details ...	33	-0.642985	-1.78205	0.00195695	0.192784	0.699	13198	tags=67%, list=24%, signal=88%
GOBP_REGULATION_OF_AMPA_RECEPTOR_ACTIVITY	GOBP_REGULATION_OF_AMPA_RECEPTOR_ACTIVITY	Details ...	26	-0.724228	-1.79767	0.00196078	0.203141	0.662	6440	tags=62%, list=12%, signal=70%
GOBP_CAMP_MEDIATED_SIGNALING	GOBP_CAMP_MEDIATED_SIGNALING	Details ...	62	-0.530011	-1.70861	0.00196078	0.222337	0.867	10610	tags=48%, list=19%, signal=60%
GOBP_MEMBRANE_DEPOLARIZATION	GOBP_MEMBRANE_DEPOLARIZATION	Details ...	87	-0.6002	-1.90784	0.00196464	0.278098	0.328	7330	tags=47%, list=13%, signal=54%
GOBP_MONOAMINE_TRANSPORT	GOBP_MONOAMINE_TRANSPORT	Details ...	79	-0.57113	-1.78928	0.00196464	0.20103	0.681	10506	tags=53%, list=19%, signal=66%
GOBP_REGULATION_OF_G_PROTEIN_COUPLED_RECEPTOR_SIGNALING_PATHWAY	GOBP_REGULATION_OF_G_PROTEIN_COUPLED_RECEPTOR_SIGNALING_PATHWAY		142	-0.453731	-1.62647	0.00196464	0.2231	0.95	9442	tags=39%, list=17%, signal=47%
GOBP_NEGATIVE_REGULATION_OF_CARBOHYDRATE_METABOLIC_PROCESS	GOBP_NEGATIVE_REGULATION_OF_CARBOHYDRATE_METABOLIC_PROCESS		50	-0.482094	-1.66619	0.00197628	0.204623	0.914	11723	tags=42%, list=21%, signal=53%
GOBP_NEGATIVE_REGULATION_OF_ATP_METABOLIC_PROCESS	GOBP_NEGATIVE_REGULATION_OF_ATP_METABOLIC_PROCESS		28	-0.505059	-1.59852	0.00197628	0.234259	0.968	4110	tags=32%, list=7%, signal=35%
GOMF_POSTSYNAPTIC_NEUROTRANSMITTER_RECEPTOR_ACTIVITY	GOMF_POSTSYNAPTIC_NEUROTRANSMITTER_RECEPTOR_ACTIVITY	Details ...	62	-0.576519	-1.70072	0.0019802	0.224077	0.875	16505	tags=69%, list=30%, signal=99%
GOBP_CALCIUM_MEDIATED_SIGNALING	GOBP_CALCIUM_MEDIATED_SIGNALING		197	-0.495774	-1.68289	0.0019802	0.213585	0.898	8751	tags=43%, list=16%, signal=50%
GOBP_CATECHOLAMINE_SECRETION	GOBP_CATECHOLAMINE_SECRETION	Details ...	53	-0.647672	-1.83136	0.00198807	0.200691	0.547	10506	tags=62%, list=19%, signal=77%
GOBP_REGULATION_OF_PROTEIN_KINASE_A_SIGNALING	GOBP_REGULATION_OF_PROTEIN_KINASE_A_SIGNALING	Details ...	23	-0.63145	-1.75957	0.00199203	0.201052	0.761	13660	tags=70%, list=25%, signal=92%
GOMF_METAL_ION_TRANSMEMBRANE_TRANSPORTER_ACTIVITY	GOMF_METAL_ION_TRANSMEMBRANE_TRANSPORTER_ACTIVITY		425	-0.42867	-1.63684	0.00373832	0.214957	0.942	11307	tags=43%, list=20%, signal=53%
GOBP_REGULATION_OF_TRANSPORTER_ACTIVITY	GOBP_REGULATION_OF_TRANSPORTER_ACTIVITY		281	-0.453467	-1.66721	0.00378072	0.205379	0.913	10752	tags=42%, list=19%, signal=51%
GOBP_SEGMENT_SPECIFICATION	GOBP_SEGMENT_SPECIFICATION	Details ...	17	-0.62577	-1.70747	0.00380228	0.222877	0.872	8086	tags=47%, list=15%, signal=55%
GOCC_TRANSPORTER_COMPLEX	GOCC_TRANSPORTER_COMPLEX		338	-0.461832	-1.66448	0.00380952	0.20225	0.914	11749	tags=47%, list=21%, signal=59%
GOBP_HEART_PROCESS	GOBP_HEART_PROCESS		285	-0.445758	-1.65657	0.00381679	0.210523	0.926	9873	tags=41%, list=18%, signal=49%
GOBP_SENSORY_PERCEPTION_OF_PAIN	GOBP_SENSORY_PERCEPTION_OF_PAIN		99	-0.470981	-1.65117	0.00383142	0.210999	0.934	10521	tags=45%, list=19%, signal=56%
GOBP_REGULATION_OF_METAL_ION_TRANSPORT	GOBP_REGULATION_OF_METAL_ION_TRANSPORT	Details ...	243	-0.463639	-1.71553	0.00383877	0.210758	0.851	10561	tags=43%, list=19%, signal=53%
GOBP_LIPID_EXPORT_FROM_CELL	GOBP_LIPID_EXPORT_FROM_CELL		81	-0.481322	-1.68908	0.00383877	0.215516	0.889	11872	tags=46%, list=21%, signal=58%
GOMF_PHOSPHORIC_DIESTER_HYDROLASE_ACTIVITY	GOMF_PHOSPHORIC_DIESTER_HYDROLASE_ACTIVITY		89	-0.49739	-1.67083	0.00383877	0.211995	0.91	9731	tags=51%, list=18%, signal=61%
GOBP_DIVALENT_INORGANIC_CATION_HOMEOSTASIS	GOBP_DIVALENT_INORGANIC_CATION_HOMEOSTASIS		498	-0.411992	-1.58274	0.00383877	0.248511	0.973	12921	tags=45%, list=23%, signal=58%
GOBP_POSITIVE_REGULATION_OF_POTASSIUM_ION_TRANSMEMBRANE_TRANSPORTER_ACTIVITY	GOBP_POSITIVE_REGULATION_OF_POTASSIUM_ION_TRANSMEMBRANE_TRANSPORTER_ACTIVITY	Details ...	25	-0.581674	-1.71958	0.00384615	0.212207	0.841	5967	tags=40%, list=11%, signal=45%
GOMF_INTRACELLULAR_LIGAND_GATED_ION_CHANNEL_ACTIVITY	GOMF_INTRACELLULAR_LIGAND_GATED_ION_CHANNEL_ACTIVITY		29	-0.542643	-1.64505	0.00384615	0.211809	0.937	11653	tags=52%, list=21%, signal=65%
GOBP_TRANSMISSION_OF_NERVE_IMPULSE	GOBP_TRANSMISSION_OF_NERVE_IMPULSE	Details ...	67	-0.562139	-1.74945	0.00387597	0.189477	0.785	7330	tags=45%, list=13%, signal=52%
GOBP_STRIATED_MUSCLE_CONTRACTION	GOBP_STRIATED_MUSCLE_CONTRACTION	Details ...	175	-0.456169	-1.70238	0.00389105	0.222416	0.874	9731	tags=41%, list=18%, signal=50%
GOBP_NEUROMUSCULAR_PROCESS	GOBP_NEUROMUSCULAR_PROCESS		90	-0.531563	-1.68069	0.00389105	0.209567	0.899	9223	tags=44%, list=17%, signal=53%
GOCC_CALYX_OF_HELD	GOCC_CALYX_OF_HELD	Details ...	16	-0.663286	-1.6908	0.00391389	0.220054	0.887	11872	tags=75%, list=21%, signal=95%
GOMF_IONOTROPIC_GLUTAMATE_RECEPTOR_ACTIVITY	GOMF_IONOTROPIC_GLUTAMATE_RECEPTOR_ACTIVITY		19	-0.661495	-1.67724	0.00392927	0.210041	0.902	14033	tags=74%, list=25%, signal=99%
GOBP_MEMBRANE_DEPOLARIZATION_DURING_CARDIAC_MUSCLE_CELL_ACTION_POTENTIAL	GOBP_MEMBRANE_DEPOLARIZATION_DURING_CARDIAC_MUSCLE_CELL_ACTION_POTENTIAL	Details ...	22	-0.736722	-1.83793	0.00395257	0.193078	0.528	9394	tags=77%, list=17%, signal=93%
GOMF_TRANSMITTER_GATED_CHANNEL_ACTIVITY	GOMF_TRANSMITTER_GATED_CHANNEL_ACTIVITY		59	-0.550361	-1.67694	0.00395257	0.208956	0.902	16505	tags=64%, list=30%, signal=92%
GOBP_NEUROPEPTIDE_SIGNALING_PATHWAY	GOBP_NEUROPEPTIDE_SIGNALING_PATHWAY		105	-0.50587	-1.67028	0.00396825	0.209899	0.912	15081	tags=53%, list=27%, signal=73%
GOBP_REGULATION_OF_EXCRETION	GOBP_REGULATION_OF_EXCRETION		22	-0.599629	-1.68659	0.00398406	0.213167	0.894	11872	tags=55%, list=21%, signal=69%
GOBP_POSITIVE_REGULATION_OF_REGULATED_SECRETORY_PATHWAY	GOBP_POSITIVE_REGULATION_OF_REGULATED_SECRETORY_PATHWAY		51	-0.549454	-1.69021	0.00399202	0.219359	0.889	8363	tags=45%, list=15%, signal=53%
GOMF_NEUROTRANSMITTER_RECEPTOR_ACTIVITY	GOMF_NEUROTRANSMITTER_RECEPTOR_ACTIVITY		111	-0.474211	-1.61088	0.00399202	0.233	0.963	16505	tags=58%, list=30%, signal=82%
GOCC_POTASSIUM_CHANNEL_COMPLEX	GOCC_POTASSIUM_CHANNEL_COMPLEX	Details ...	99	-0.544833	-1.72997	0.00400802	0.208427	0.825	9512	tags=53%, list=17%, signal=63%
GOBP_ATRIAL_CARDIAC_MUSCLE_CELL_TO_AV_NODE_CELL_SIGNALING	GOBP_ATRIAL_CARDIAC_MUSCLE_CELL_TO_AV_NODE_CELL_SIGNALING	Details ...	19	-0.684794	-1.80606	0.0040568	0.199948	0.629	6558	tags=53%, list=12%, signal=60%
GOMF_CALCIUM_ION_TRANSMEMBRANE_TRANSPORTER_ACTIVITY	GOMF_CALCIUM_ION_TRANSMEMBRANE_TRANSPORTER_ACTIVITY		134	-0.456956	-1.62397	0.00559702	0.221423	0.955	7955	tags=40%, list=14%, signal=47%
GOBP_ACTIVATION_OF_ADENYLATE_CYCLASE_ACTIVITY	GOBP_ACTIVATION_OF_ADENYLATE_CYCLASE_ACTIVITY		38	-0.529373	-1.57846	0.00564972	0.25062	0.975	16409	tags=71%, list=30%, signal=101%
GOBP_REGULATION_OF_CATION_CHANNEL_ACTIVITY	GOBP_REGULATION_OF_CATION_CHANNEL_ACTIVITY	Details ...	176	-0.506004	-1.7145	0.00568182	0.210861	0.855	12388	tags=50%, list=22%, signal=64%
GOMF_SODIUM_ION_TRANSMEMBRANE_TRANSPORTER_ACTIVITY	GOMF_SODIUM_ION_TRANSMEMBRANE_TRANSPORTER_ACTIVITY		146	-0.432234	-1.58223	0.00568182	0.248639	0.973	11972	tags=46%, list=22%, signal=58%
GOBP_REGULATION_OF_HEART_CONTRACTION	GOBP_REGULATION_OF_HEART_CONTRACTION	Details ...	241	-0.474306	-1.69866	0.00570342	0.21677	0.881	11872	tags=48%, list=21%, signal=61%
GOBP_POSITIVE_REGULATION_OF_TRANSPORTER_ACTIVITY	GOBP_POSITIVE_REGULATION_OF_TRANSPORTER_ACTIVITY		112	-0.464763	-1.67847	0.00570342	0.212746	0.901	7384	tags=36%, list=13%, signal=41%
GOBP_NEGATIVE_REGULATION_OF_OXIDOREDUCTASE_ACTIVITY	GOBP_NEGATIVE_REGULATION_OF_OXIDOREDUCTASE_ACTIVITY		32	-0.535078	-1.66572	0.00570342	0.204167	0.914	10752	tags=47%, list=19%, signal=58%
GOCC_SEH1_ASSOCIATED_COMPLEX	GOCC_SEH1_ASSOCIATED_COMPLEX		17	-0.680833	-1.67603	0.00574713	0.207537	0.904	11112	tags=71%, list=20%, signal=88%
GOMF_PHOSPHORUS_OXYGEN_LYASE_ACTIVITY	GOMF_PHOSPHORUS_OXYGEN_LYASE_ACTIVITY	Details ...	22	-0.66029	-1.76957	0.00575816	0.205098	0.739	15430	tags=68%, list=28%, signal=95%
GOBP_REGULATION_OF_SODIUM_ION_TRANSPORT	GOBP_REGULATION_OF_SODIUM_ION_TRANSPORT		87	-0.46552	-1.66957	0.00575816	0.206614	0.913	9041	tags=45%, list=16%, signal=54%
GOBP_CALCIUM_ION_TRANSPORT_INTO_CYTOSOL	GOBP_CALCIUM_ION_TRANSPORT_INTO_CYTOSOL		151	-0.483601	-1.67454	0.00578035	0.20747	0.905	11034	tags=48%, list=20%, signal=60%
GOMF_LIGAND_GATED_CALCIUM_CHANNEL_ACTIVITY	GOMF_LIGAND_GATED_CALCIUM_CHANNEL_ACTIVITY		26	-0.499417	-1.50179	0.00578035	0.287883	0.992	14033	tags=58%, list=25%, signal=77%
GOBP_REGULATION_OF_REGULATED_SECRETORY_PATHWAY	GOBP_REGULATION_OF_REGULATED_SECRETORY_PATHWAY		136	-0.493191	-1.64537	0.00579151	0.21248	0.937	10407	tags=47%, list=19%, signal=58%
GOMF_SPECTRIN_BINDING	GOMF_SPECTRIN_BINDING		26	-0.625959	-1.69	0.00580271	0.217761	0.889	6226	tags=38%, list=11%, signal=43%
GOBP_SENSORY_PERCEPTION_OF_MECHANICAL_STIMULUS	GOBP_SENSORY_PERCEPTION_OF_MECHANICAL_STIMULUS		167	-0.369365	-1.45407	0.00580271	0.331998	0.997	5320	tags=25%, list=10%, signal=27%
GOMF_PEPTIDE_HORMONE_BINDING	GOMF_PEPTIDE_HORMONE_BINDING		50	-0.575375	-1.68412	0.00588235	0.214735	0.897	14554	tags=70%, list=26%, signal=95%
GOBP_REGULATION_OF_CYTOSOLIC_CALCIUM_ION_CONCENTRATION	GOBP_REGULATION_OF_CYTOSOLIC_CALCIUM_ION_CONCENTRATION		343	-0.46354	-1.65345	0.00588235	0.211411	0.93	11307	tags=47%, list=20%, signal=59%
GOBP_DETECTION_OF_MECHANICAL_STIMULUS_INVOLVED_IN_SENSORY_PERCEPTION	GOBP_DETECTION_OF_MECHANICAL_STIMULUS_INVOLVED_IN_SENSORY_PERCEPTION	Details ...	32	-0.548108	-1.72105	0.00591716	0.211222	0.836	5209	tags=44%, list=9%, signal=48%
GOBP_RENAL_SODIUM_EXCRETION	GOBP_RENAL_SODIUM_EXCRETION	Details ...	21	-0.624401	-1.76007	0.00601202	0.203951	0.76	11872	tags=57%, list=21%, signal=73%
GOBP_NEGATIVE_REGULATION_OF_AMINE_TRANSPORT	GOBP_NEGATIVE_REGULATION_OF_AMINE_TRANSPORT	Details ...	26	-0.688083	-1.73433	0.00603622	0.203873	0.814	10202	tags=69%, list=18%, signal=85%
GOBP_NEGATIVE_REGULATION_OF_ANION_TRANSMEMBRANE_TRANSPORT	GOBP_NEGATIVE_REGULATION_OF_ANION_TRANSMEMBRANE_TRANSPORT		34	-0.529763	-1.66279	0.00603622	0.202938	0.917	9030	tags=35%, list=16%, signal=42%
GOBP_NEGATIVE_REGULATION_OF_LIPID_CATABOLIC_PROCESS	GOBP_NEGATIVE_REGULATION_OF_LIPID_CATABOLIC_PROCESS		25	-0.584912	-1.66648	0.00636943	0.205469	0.914	14654	tags=60%, list=26%, signal=82%
GOCC_PERIKARYON	GOCC_PERIKARYON	Details ...	151	-0.520409	-1.69174	0.0075188	0.220098	0.887	9512	tags=47%, list=17%, signal=57%
GOBP_MONOVALENT_INORGANIC_CATION_HOMEOSTASIS	GOBP_MONOVALENT_INORGANIC_CATION_HOMEOSTASIS		161	-0.423891	-1.5672	0.00754717	0.251407	0.98	11954	tags=39%, list=22%, signal=49%
GOBP_MEMBRANE_REPOLARIZATION	GOBP_MEMBRANE_REPOLARIZATION	Details ...	44	-0.562645	-1.76066	0.00760456	0.206462	0.758	9394	tags=50%, list=17%, signal=60%
GOBP_NEGATIVE_REGULATION_OF_SYNAPTIC_TRANSMISSION	GOBP_NEGATIVE_REGULATION_OF_SYNAPTIC_TRANSMISSION		66	-0.557233	-1.66246	0.00760456	0.202299	0.917	10036	tags=52%, list=18%, signal=63%
GOBP_SODIUM_ION_TRANSMEMBRANE_TRANSPORT	GOBP_SODIUM_ION_TRANSMEMBRANE_TRANSPORT		171	-0.412458	-1.55065	0.00760456	0.25849	0.984	11957	tags=44%, list=22%, signal=57%
GOBP_HORMONE_TRANSPORT	GOBP_HORMONE_TRANSPORT		312	-0.411896	-1.54698	0.00761905	0.258656	0.985	11299	tags=42%, list=20%, signal=52%
GOBP_FEEDING_BEHAVIOR	GOBP_FEEDING_BEHAVIOR		93	-0.448124	-1.54629	0.00761905	0.257571	0.985	13560	tags=45%, list=25%, signal=60%
GOBP_NEGATIVE_REGULATION_OF_G_PROTEIN_COUPLED_RECEPTOR_SIGNALING_PATHWAY	GOBP_NEGATIVE_REGULATION_OF_G_PROTEIN_COUPLED_RECEPTOR_SIGNALING_PATHWAY		49	-0.50551	-1.5949	0.00763359	0.238691	0.969	6555	tags=39%, list=12%, signal=44%
GOBP_CELL_MIGRATION_INVOLVED_IN_GASTRULATION	GOBP_CELL_MIGRATION_INVOLVED_IN_GASTRULATION		15	-0.604928	-1.63685	0.00764818	0.216153	0.942	8266	tags=47%, list=15%, signal=55%
GOBP_STEROID_HORMONE_SECRETION	GOBP_STEROID_HORMONE_SECRETION		21	-0.626922	-1.66958	0.00766283	0.208149	0.912	11266	tags=62%, list=20%, signal=78%
GOBP_ACTIVATION_OF_JANUS_KINASE_ACTIVITY	GOBP_ACTIVATION_OF_JANUS_KINASE_ACTIVITY		15	-0.694075	-1.63671	0.00767754	0.214014	0.942	12360	tags=80%, list=22%, signal=103%
GOMF_CALCIUM_RELEASE_CHANNEL_ACTIVITY	GOMF_CALCIUM_RELEASE_CHANNEL_ACTIVITY		17	-0.628891	-1.67038	0.00769231	0.211386	0.912	11034	tags=65%, list=20%, signal=81%
GOMF_VOLTAGE_GATED_POTASSIUM_CHANNEL_ACTIVITY_INVOLVED_IN_CARDIAC_MUSCLE_CELL_ACTION_POTENTIAL_REPOLARIZATION	GOMF_VOLTAGE_GATED_POTASSIUM_CHANNEL_ACTIVITY_INVOLVED_IN_CARDIAC_MUSCLE_CELL_ACTION_POTENTIAL_REPOLARIZATION	Details ...	15	-0.66986	-1.71628	0.00772201	0.211548	0.847	13613	tags=73%, list=25%, signal=97%
GOMF_ICOSANOID_RECEPTOR_ACTIVITY	GOMF_ICOSANOID_RECEPTOR_ACTIVITY	Details ...	15	-0.69981	-1.7769	0.00773694	0.195683	0.712	8826	tags=73%, list=16%, signal=87%
GOBP_POSITIVE_REGULATION_OF_CALCIUM_ION_TRANSPORT	GOBP_POSITIVE_REGULATION_OF_CALCIUM_ION_TRANSPORT		118	-0.457337	-1.63177	0.00773694	0.221822	0.944	10561	tags=42%, list=19%, signal=52%
GOBP_REGULATION_OF_TORC1_SIGNALING	GOBP_REGULATION_OF_TORC1_SIGNALING		39	-0.590798	-1.64731	0.0077821	0.210926	0.936	7732	tags=44%, list=14%, signal=51%
GOBP_REGULATION_OF_CELLULAR_CARBOHYDRATE_METABOLIC_PROCESS	GOBP_REGULATION_OF_CELLULAR_CARBOHYDRATE_METABOLIC_PROCESS		144	-0.397713	-1.50483	0.0077821	0.285691	0.992	11295	tags=42%, list=20%, signal=52%
GOBP_NEUROMUSCULAR_PROCESS_CONTROLLING_BALANCE	GOBP_NEUROMUSCULAR_PROCESS_CONTROLLING_BALANCE		42	-0.584555	-1.66547	0.00782779	0.201742	0.914	14033	tags=62%, list=25%, signal=83%
GOMF_NEUROTRANSMITTER_RECEPTOR_ACTIVITY_INVOLVED_IN_REGULATION_OF_POSTSYNAPTIC_MEMBRANE_POTENTIAL	GOMF_NEUROTRANSMITTER_RECEPTOR_ACTIVITY_INVOLVED_IN_REGULATION_OF_POSTSYNAPTIC_MEMBRANE_POTENTIAL		47	-0.580906	-1.66246	0.00788955	0.200923	0.917	16505	tags=72%, list=30%, signal=103%
GOBP_MEMBRANE_REPOLARIZATION_DURING_ACTION_POTENTIAL	GOBP_MEMBRANE_REPOLARIZATION_DURING_ACTION_POTENTIAL		27	-0.538494	-1.65579	0.00788955	0.20936	0.929	3119	tags=33%, list=6%, signal=35%
GOBP_BLOOD_COAGULATION_INTRINSIC_PATHWAY	GOBP_BLOOD_COAGULATION_INTRINSIC_PATHWAY	Details ...	18	-0.675835	-1.72484	0.00795229	0.211045	0.833	9925	tags=56%, list=18%, signal=68%
GOCC_GOLGI_CIS_CISTERNA	GOCC_GOLGI_CIS_CISTERNA		30	-0.599551	-1.68278	0.00796813	0.211966	0.898	14305	tags=60%, list=26%, signal=81%
GOBP_NOREPINEPHRINE_SECRETION	GOBP_NOREPINEPHRINE_SECRETION	Details ...	16	-0.69774	-1.70025	0.00803213	0.220155	0.877	10202	tags=63%, list=18%, signal=77%
GOBP_REGULATION_OF_APPETITE	GOBP_REGULATION_OF_APPETITE		23	-0.572276	-1.64429	0.00833333	0.2097	0.937	12015	tags=61%, list=22%, signal=78%
GOCC_CELL_BODY_MEMBRANE	GOCC_CELL_BODY_MEMBRANE	Details ...	31	-0.624995	-1.69988	0.00924214	0.216231	0.877	6166	tags=48%, list=11%, signal=54%
GOBP_REGULATION_OF_POTASSIUM_ION_TRANSPORT	GOBP_REGULATION_OF_POTASSIUM_ION_TRANSPORT		98	-0.46474	-1.61825	0.00931099	0.22646	0.961	9512	tags=42%, list=17%, signal=50%
GOBP_DICARBOXYLIC_ACID_TRANSPORT	GOBP_DICARBOXYLIC_ACID_TRANSPORT		93	-0.431528	-1.56734	0.00931099	0.251999	0.98	12909	tags=48%, list=23%, signal=63%
GOBP_REGULATION_OF_CARDIAC_CONDUCTION	GOBP_REGULATION_OF_CARDIAC_CONDUCTION	Details ...	58	-0.576026	-1.74664	0.00938086	0.189823	0.79	7081	tags=52%, list=13%, signal=59%
GOBP_REGULATION_OF_TRANS_SYNAPTIC_SIGNALING	GOBP_REGULATION_OF_TRANS_SYNAPTIC_SIGNALING		405	-0.499305	-1.66821	0.00943396	0.204867	0.913	11281	tags=50%, list=20%, signal=62%
GOMF_PEPTIDE_HORMONE_RECEPTOR_BINDING	GOMF_PEPTIDE_HORMONE_RECEPTOR_BINDING		21	-0.597093	-1.647	0.0095057	0.210213	0.936	9591	tags=52%, list=17%, signal=63%
GOBP_RESPONSE_TO_MAGNESIUM_ION	GOBP_RESPONSE_TO_MAGNESIUM_ION		18	-0.570558	-1.61899	0.00954198	0.225979	0.961	5967	tags=44%, list=11%, signal=50%
GOMF_PHOSPHATIDYLINOSITOL_3_KINASE_REGULATOR_ACTIVITY	GOMF_PHOSPHATIDYLINOSITOL_3_KINASE_REGULATOR_ACTIVITY	Details ...	20	-0.681676	-1.71756	0.00959693	0.213777	0.846	7548	tags=55%, list=14%, signal=64%
GOBP_ADULT_BEHAVIOR	GOBP_ADULT_BEHAVIOR		117	-0.512633	-1.64485	0.00959693	0.210956	0.937	13426	tags=56%, list=24%, signal=73%
GOBP_POSITIVE_REGULATION_OF_TRANSMEMBRANE_TRANSPORT	GOBP_POSITIVE_REGULATION_OF_TRANSMEMBRANE_TRANSPORT		205	-0.397996	-1.51107	0.00961539	0.280089	0.99	10752	tags=39%, list=19%, signal=48%
GOMF_1_PHOSPHATIDYLINOSITOL_3_KINASE_REGULATOR_ACTIVITY	GOMF_1_PHOSPHATIDYLINOSITOL_3_KINASE_REGULATOR_ACTIVITY		16	-0.712257	-1.67818	0.00965251	0.209835	0.902	7548	tags=56%, list=14%, signal=65%
GOBP_CYCLIC_NUCLEOTIDE_METABOLIC_PROCESS	GOBP_CYCLIC_NUCLEOTIDE_METABOLIC_PROCESS		40	-0.580979	-1.67201	0.00965251	0.211179	0.909	15999	tags=75%, list=29%, signal=105%
GOBP_AMINE_TRANSPORT	GOBP_AMINE_TRANSPORT		94	-0.531088	-1.68086	0.00967118	0.210876	0.899	13576	tags=61%, list=25%, signal=80%
GOMF_CHANNEL_REGULATOR_ACTIVITY	GOMF_CHANNEL_REGULATOR_ACTIVITY		144	-0.402131	-1.54813	0.00968992	0.260399	0.985	9512	tags=35%, list=17%, signal=42%
GOBP_CYTOSOLIC_CALCIUM_ION_TRANSPORT	GOBP_CYTOSOLIC_CALCIUM_ION_TRANSPORT		172	-0.460521	-1.61405	0.00972763	0.230724	0.962	11034	tags=47%, list=20%, signal=59%
GOMF_G_PROTEIN_ALPHA_SUBUNIT_BINDING	GOMF_G_PROTEIN_ALPHA_SUBUNIT_BINDING	Details ...	25	-0.608963	-1.70482	0.00974659	0.221576	0.873	4604	tags=40%, list=8%, signal=44%
GOBP_SYNAPTIC_VESICLE_PRIMING	GOBP_SYNAPTIC_VESICLE_PRIMING		19	-0.692345	-1.68097	0.00976562	0.212442	0.899	3615	tags=53%, list=7%, signal=56%
GOBP_RENAL_SYSTEM_PROCESS	GOBP_RENAL_SYSTEM_PROCESS		118	-0.438824	-1.57468	0.00978474	0.251521	0.978	11872	tags=47%, list=21%, signal=59%
GOBP_ACTIN_MEDIATED_CELL_CONTRACTION	GOBP_ACTIN_MEDIATED_CELL_CONTRACTION		119	-0.438248	-1.58943	0.00992064	0.241868	0.972	9731	tags=39%, list=18%, signal=47%
GOBP_CARDIAC_MUSCLE_CELL_ACTION_POTENTIAL	GOBP_CARDIAC_MUSCLE_CELL_ACTION_POTENTIAL		75	-0.524025	-1.67639	0.01002	0.208453	0.903	9394	tags=47%, list=17%, signal=56%
GOBP_DOPAMINE_SECRETION	GOBP_DOPAMINE_SECRETION		33	-0.628891	-1.65488	0.0101215	0.209868	0.93	9688	tags=61%, list=18%, signal=73%
GOBP_NEGATIVE_REGULATION_OF_GLUCOSE_TRANSMEMBRANE_TRANSPORT	GOBP_NEGATIVE_REGULATION_OF_GLUCOSE_TRANSMEMBRANE_TRANSPORT	Details ...	18	-0.610033	-1.69527	0.0101833	0.22057	0.885	9030	tags=39%, list=16%, signal=46%
GOBP_CELLULAR_RESPONSE_TO_CALCIUM_ION	GOBP_CELLULAR_RESPONSE_TO_CALCIUM_ION		81	-0.46171	-1.54651	0.010989	0.258751	0.985	5752	tags=38%, list=10%, signal=43%
GOBP_IMPORT_ACROSS_PLASMA_MEMBRANE	GOBP_IMPORT_ACROSS_PLASMA_MEMBRANE		161	-0.392469	-1.49876	0.010989	0.291339	0.992	7994	tags=32%, list=14%, signal=38%
GOBP_POSITIVE_REGULATION_OF_NEURON_DIFFERENTIATION	GOBP_POSITIVE_REGULATION_OF_NEURON_DIFFERENTIATION		92	-0.448831	-1.55682	0.0110701	0.255193	0.982	13805	tags=48%, list=25%, signal=64%
GOMF_SYNTAXIN_1_BINDING	GOMF_SYNTAXIN_1_BINDING	Details ...	26	-0.68619	-1.74165	0.0112782	0.192085	0.802	6610	tags=58%, list=12%, signal=65%
GOBP_SIGNAL_RELEASE	GOBP_SIGNAL_RELEASE		475	-0.434663	-1.60201	0.0112782	0.237415	0.966	9688	tags=41%, list=18%, signal=49%
GOBP_REGULATION_OF_LYASE_ACTIVITY	GOBP_REGULATION_OF_LYASE_ACTIVITY		49	-0.48947	-1.5851	0.0112782	0.247376	0.973	16587	tags=61%, list=30%, signal=87%
GOBP_MODULATION_OF_EXCITATORY_POSTSYNAPTIC_POTENTIAL	GOBP_MODULATION_OF_EXCITATORY_POSTSYNAPTIC_POTENTIAL		44	-0.571375	-1.66884	0.0112994	0.205089	0.913	8311	tags=52%, list=15%, signal=61%
GOBP_NEGATIVE_REGULATION_OF_BLOOD_CIRCULATION	GOBP_NEGATIVE_REGULATION_OF_BLOOD_CIRCULATION		25	-0.549617	-1.63982	0.0114286	0.215005	0.939	11872	tags=52%, list=21%, signal=66%
GOBP_REGULATION_OF_CALCIUM_ION_TRANSMEMBRANE_TRANSPORT	GOBP_REGULATION_OF_CALCIUM_ION_TRANSMEMBRANE_TRANSPORT		143	-0.448391	-1.59942	0.0114504	0.236465	0.967	10561	tags=42%, list=19%, signal=52%
GOCC_TRANSCRIPTIONALLY_ACTIVE_CHROMATIN	GOCC_TRANSCRIPTIONALLY_ACTIVE_CHROMATIN		23	-0.629212	-1.64968	0.0114723	0.212648	0.934	7639	tags=48%, list=14%, signal=55%
GOBP_LONG_TERM_SYNAPTIC_DEPRESSION	GOBP_LONG_TERM_SYNAPTIC_DEPRESSION		30	-0.588716	-1.61503	0.0114723	0.230987	0.961	12386	tags=60%, list=22%, signal=77%
GOBP_PHAGOLYSOSOME_ASSEMBLY	GOBP_PHAGOLYSOSOME_ASSEMBLY		15	-0.638361	-1.68316	0.0115385	0.215027	0.898	6841	tags=47%, list=12%, signal=53%
GOBP_POSITIVE_REGULATION_OF_POTASSIUM_ION_TRANSMEMBRANE_TRANSPORT	GOBP_POSITIVE_REGULATION_OF_POTASSIUM_ION_TRANSMEMBRANE_TRANSPORT		38	-0.540063	-1.68121	0.0115385	0.21384	0.899	9394	tags=45%, list=17%, signal=54%
GOBP_LEARNING	GOBP_LEARNING		130	-0.48347	-1.5725	0.0115385	0.24944	0.979	10467	tags=48%, list=19%, signal=59%
GOBP_INSULIN_SECRETION	GOBP_INSULIN_SECRETION		207	-0.449933	-1.57112	0.0115385	0.251356	0.98	9591	tags=43%, list=17%, signal=51%
GOBP_REGULATION_OF_HEART_RATE	GOBP_REGULATION_OF_HEART_RATE		97	-0.524595	-1.68733	0.0115607	0.213625	0.894	11575	tags=54%, list=21%, signal=68%
GOMF_NEUROPEPTIDE_BINDING	GOMF_NEUROPEPTIDE_BINDING		24	-0.637382	-1.68983	0.0116054	0.216021	0.889	10746	tags=67%, list=19%, signal=83%
GOMF_CYCLASE_ACTIVITY	GOMF_CYCLASE_ACTIVITY		22	-0.593773	-1.62346	0.0116505	0.221545	0.957	15430	tags=59%, list=28%, signal=82%
GOBP_CORTICOSTEROID_HORMONE_SECRETION	GOBP_CORTICOSTEROID_HORMONE_SECRETION		16	-0.696047	-1.68779	0.0118577	0.214536	0.892	11266	tags=69%, list=20%, signal=86%
GOBP_NEGATIVE_REGULATION_OF_NUCLEOTIDE_METABOLIC_PROCESS	GOBP_NEGATIVE_REGULATION_OF_NUCLEOTIDE_METABOLIC_PROCESS		22	-0.545315	-1.64798	0.0118577	0.210912	0.936	6004	tags=41%, list=11%, signal=46%
GOMF_GLUTAMATE_RECEPTOR_ACTIVITY	GOMF_GLUTAMATE_RECEPTOR_ACTIVITY		27	-0.638007	-1.64851	0.0118812	0.21102	0.935	16070	tags=78%, list=29%, signal=110%
GOBP_REGULATION_OF_SKELETAL_MUSCLE_CONTRACTION	GOBP_REGULATION_OF_SKELETAL_MUSCLE_CONTRACTION		15	-0.652095	-1.61141	0.0124481	0.233079	0.963	12321	tags=73%, list=22%, signal=94%
GOBP_RESPIRATORY_GASEOUS_EXCHANGE_BY_RESPIRATORY_SYSTEM	GOBP_RESPIRATORY_GASEOUS_EXCHANGE_BY_RESPIRATORY_SYSTEM		65	-0.457016	-1.52029	0.012963	0.274837	0.989	13879	tags=52%, list=25%, signal=70%
GOBP_POSITIVE_REGULATION_OF_LYASE_ACTIVITY	GOBP_POSITIVE_REGULATION_OF_LYASE_ACTIVITY		22	-0.596613	-1.68782	0.0130112	0.216502	0.891	14355	tags=55%, list=26%, signal=74%
GOBP_CELL_VOLUME_HOMEOSTASIS	GOBP_CELL_VOLUME_HOMEOSTASIS		29	-0.476702	-1.52246	0.0130354	0.275359	0.989	5323	tags=38%, list=10%, signal=42%
GOCC_POSTSYNAPTIC_MEMBRANE	GOCC_POSTSYNAPTIC_MEMBRANE		265	-0.514155	-1.66329	0.013308	0.203324	0.916	9150	tags=46%, list=17%, signal=55%
GOBP_SECRETORY_GRANULE_ORGANIZATION	GOBP_SECRETORY_GRANULE_ORGANIZATION		35	-0.540078	-1.62048	0.013308	0.225331	0.96	8171	tags=40%, list=15%, signal=47%
GOBP_STARTLE_RESPONSE	GOBP_STARTLE_RESPONSE		23	-0.590369	-1.63811	0.0133588	0.214883	0.94	6248	tags=43%, list=11%, signal=49%
GOMF_CALCIUM_DEPENDENT_PROTEIN_KINASE_ACTIVITY	GOMF_CALCIUM_DEPENDENT_PROTEIN_KINASE_ACTIVITY		24	-0.549527	-1.57321	0.0133843	0.248951	0.978	8448	tags=46%, list=15%, signal=54%
GOBP_REGULATION_OF_HORMONE_SECRETION	GOBP_REGULATION_OF_HORMONE_SECRETION		260	-0.408992	-1.52839	0.0134615	0.27303	0.989	11299	tags=42%, list=20%, signal=52%
GOBP_CALCIUM_ION_REGULATED_EXOCYTOSIS	GOBP_CALCIUM_ION_REGULATED_EXOCYTOSIS	Details ...	63	-0.569108	-1.69378	0.0135397	0.217169	0.886	6213	tags=41%, list=11%, signal=46%
GOBP_REGULATION_OF_NMDA_RECEPTOR_ACTIVITY	GOBP_REGULATION_OF_NMDA_RECEPTOR_ACTIVITY		36	-0.581955	-1.60274	0.0135397	0.23695	0.966	7602	tags=50%, list=14%, signal=58%
GOBP_SEQUESTERING_OF_CALCIUM_ION	GOBP_SEQUESTERING_OF_CALCIUM_ION		118	-0.467245	-1.58099	0.0135397	0.250303	0.974	7081	tags=40%, list=13%, signal=46%
GOCC_GABA_ERGIC_SYNAPSE	GOCC_GABA_ERGIC_SYNAPSE		64	-0.577569	-1.65592	0.0136187	0.210466	0.927	9041	tags=55%, list=16%, signal=65%
GOBP_REGULATION_OF_PEPTIDE_HORMONE_SECRETION	GOBP_REGULATION_OF_PEPTIDE_HORMONE_SECRETION		209	-0.425519	-1.53281	0.0136187	0.270751	0.988	9591	tags=40%, list=17%, signal=48%
GOBP_CARDIAC_MUSCLE_CELL_ACTION_POTENTIAL_INVOLVED_IN_CONTRACTION	GOBP_CARDIAC_MUSCLE_CELL_ACTION_POTENTIAL_INVOLVED_IN_CONTRACTION		53	-0.52208	-1.64267	0.0136719	0.21155	0.938	6558	tags=40%, list=12%, signal=45%
GOMF_CYCLIC_NUCLEOTIDE_BINDING	GOMF_CYCLIC_NUCLEOTIDE_BINDING		37	-0.520987	-1.54806	0.0137525	0.259705	0.985	12211	tags=54%, list=22%, signal=69%
GOBP_REGULATION_OF_CALCIUM_ION_DEPENDENT_EXOCYTOSIS	GOBP_REGULATION_OF_CALCIUM_ION_DEPENDENT_EXOCYTOSIS		41	-0.568057	-1.62846	0.0137795	0.223691	0.946	8062	tags=49%, list=15%, signal=57%
GOBP_ADULT_LOCOMOTORY_BEHAVIOR	GOBP_ADULT_LOCOMOTORY_BEHAVIOR		62	-0.498849	-1.55417	0.0137795	0.257257	0.983	9610	tags=44%, list=17%, signal=53%
GOMF_ODORANT_BINDING	GOMF_ODORANT_BINDING		115	-0.427054	-1.56233	0.0138614	0.250809	0.982	21754	tags=28%, list=39%, signal=46%
GOMF_G_PROTEIN_BETA_SUBUNIT_BINDING	GOMF_G_PROTEIN_BETA_SUBUNIT_BINDING		19	-0.596581	-1.61036	0.0138889	0.231774	0.963	6605	tags=53%, list=12%, signal=60%
GOBP_IONOTROPIC_GLUTAMATE_RECEPTOR_SIGNALING_PATHWAY	GOBP_IONOTROPIC_GLUTAMATE_RECEPTOR_SIGNALING_PATHWAY		27	-0.595501	-1.59369	0.014	0.23916	0.97	14033	tags=67%, list=25%, signal=89%
GOBP_POTASSIUM_ION_HOMEOSTASIS	GOBP_POTASSIUM_ION_HOMEOSTASIS		29	-0.501256	-1.51905	0.0146252	0.275244	0.989	9873	tags=45%, list=18%, signal=55%
GOBP_NEGATIVE_REGULATION_OF_BLOOD_PRESSURE	GOBP_NEGATIVE_REGULATION_OF_BLOOD_PRESSURE		39	-0.508766	-1.5995	0.0149533	0.237351	0.967	12452	tags=51%, list=23%, signal=66%
GOBP_COGNITION	GOBP_COGNITION		276	-0.43747	-1.51877	0.0149813	0.275102	0.989	11319	tags=45%, list=20%, signal=57%
GOBP_LIPOPROTEIN_LOCALIZATION	GOBP_LIPOPROTEIN_LOCALIZATION		15	-0.598868	-1.53326	0.0150659	0.270558	0.988	3818	tags=40%, list=7%, signal=43%
GOBP_NEUROTRANSMITTER_TRANSPORT	GOBP_NEUROTRANSMITTER_TRANSPORT		209	-0.505077	-1.65961	0.0151229	0.205416	0.922	12222	tags=54%, list=22%, signal=69%
GOBP_REGULATION_OF_PEPTIDE_SECRETION	GOBP_REGULATION_OF_PEPTIDE_SECRETION		304	-0.381032	-1.48268	0.0152964	0.305116	0.995	9591	tags=35%, list=17%, signal=42%
GOBP_OVULATION_CYCLE	GOBP_OVULATION_CYCLE		62	-0.490948	-1.5365	0.0153551	0.267025	0.988	11235	tags=52%, list=20%, signal=65%
GOBP_POSITIVE_REGULATION_OF_NEUROTRANSMITTER_SECRETION	GOBP_POSITIVE_REGULATION_OF_NEUROTRANSMITTER_SECRETION		17	-0.676253	-1.65134	0.0153846	0.211953	0.933	4304	tags=47%, list=8%, signal=51%
GOBP_DETECTION_OF_MECHANICAL_STIMULUS	GOBP_DETECTION_OF_MECHANICAL_STIMULUS		49	-0.463669	-1.55211	0.0155039	0.258965	0.984	10517	tags=49%, list=19%, signal=60%
GOBP_REGULATION_OF_MEMBRANE_REPOLARIZATION	GOBP_REGULATION_OF_MEMBRANE_REPOLARIZATION		33	-0.531679	-1.60147	0.0155945	0.237507	0.966	9394	tags=42%, list=17%, signal=51%
GOBP_REGULATION_OF_CALCIUM_ION_TRANSPORT_INTO_CYTOSOL	GOBP_REGULATION_OF_CALCIUM_ION_TRANSPORT_INTO_CYTOSOL		94	-0.476886	-1.58436	0.015625	0.248105	0.973	10561	tags=47%, list=19%, signal=58%
GOBP_NEGATIVE_REGULATION_OF_TORC1_SIGNALING	GOBP_NEGATIVE_REGULATION_OF_TORC1_SIGNALING		17	-0.663893	-1.57406	0.0156863	0.249957	0.978	12159	tags=65%, list=22%, signal=83%
GOBP_NEGATIVE_REGULATION_OF_LYASE_ACTIVITY	GOBP_NEGATIVE_REGULATION_OF_LYASE_ACTIVITY		25	-0.530215	-1.5374	0.0157171	0.266761	0.988	9041	tags=48%, list=16%, signal=57%
GOMF_HORMONE_ACTIVITY	GOMF_HORMONE_ACTIVITY		122	-0.41258	-1.41736	0.0157791	0.357169	0.999	17212	tags=53%, list=31%, signal=77%
GOMF_SOLUTE_ANION_ANTIPORTER_ACTIVITY	GOMF_SOLUTE_ANION_ANTIPORTER_ACTIVITY		31	-0.533079	-1.56492	0.015873	0.250549	0.981	11577	tags=48%, list=21%, signal=61%
GOBP_IMPORT_INTO_CELL	GOBP_IMPORT_INTO_CELL		230	-0.371169	-1.44911	0.0166359	0.335351	0.997	8521	tags=32%, list=15%, signal=37%
GOBP_NEGATIVE_REGULATION_OF_ION_TRANSPORT	GOBP_NEGATIVE_REGULATION_OF_ION_TRANSPORT		308	-0.363761	-1.45457	0.0170455	0.331689	0.997	8505	tags=29%, list=15%, signal=34%
GOBP_NEGATIVE_REGULATION_OF_SODIUM_ION_TRANSPORT	GOBP_NEGATIVE_REGULATION_OF_SODIUM_ION_TRANSPORT		18	-0.5736	-1.58378	0.0171429	0.248346	0.973	7384	tags=44%, list=13%, signal=51%
GOBP_REGULATION_OF_NEUROTRANSMITTER_LEVELS	GOBP_REGULATION_OF_NEUROTRANSMITTER_LEVELS		211	-0.494307	-1.63627	0.0172414	0.213769	0.942	12222	tags=53%, list=22%, signal=67%
GOBP_LOCALIZATION_WITHIN_MEMBRANE	GOBP_LOCALIZATION_WITHIN_MEMBRANE		75	-0.439448	-1.48688	0.0172414	0.301352	0.995	8363	tags=40%, list=15%, signal=47%
GOBP_NEGATIVE_REGULATION_OF_MICROTUBULE_POLYMERIZATION_OR_DEPOLYMERIZATION	GOBP_NEGATIVE_REGULATION_OF_MICROTUBULE_POLYMERIZATION_OR_DEPOLYMERIZATION		37	-0.557129	-1.61015	0.0173077	0.230033	0.963	10315	tags=51%, list=19%, signal=63%
GOBP_REGULATION_OF_RESPIRATORY_GASEOUS_EXCHANGE	GOBP_REGULATION_OF_RESPIRATORY_GASEOUS_EXCHANGE		20	-0.576952	-1.59873	0.0173077	0.235835	0.967	13586	tags=70%, list=25%, signal=93%
GOBP_REGULATION_OF_ENDOCRINE_PROCESS	GOBP_REGULATION_OF_ENDOCRINE_PROCESS		34	-0.536713	-1.5641	0.0173077	0.251343	0.981	8344	tags=41%, list=15%, signal=48%
GOBP_DOPAMINE_TRANSPORT	GOBP_DOPAMINE_TRANSPORT		47	-0.564034	-1.63033	0.0174081	0.221312	0.945	9688	tags=51%, list=18%, signal=62%
GOBP_SODIUM_ION_HOMEOSTASIS	GOBP_SODIUM_ION_HOMEOSTASIS		54	-0.428466	-1.49211	0.0175097	0.298931	0.994	11872	tags=43%, list=21%, signal=54%
GOBP_TORC1_SIGNALING	GOBP_TORC1_SIGNALING		47	-0.549998	-1.57108	0.0176471	0.250556	0.98	10488	tags=45%, list=19%, signal=55%
GOBP_NEGATIVE_REGULATION_OF_GTPASE_ACTIVITY	GOBP_NEGATIVE_REGULATION_OF_GTPASE_ACTIVITY		45	-0.489878	-1.55903	0.0176471	0.252549	0.982	5966	tags=36%, list=11%, signal=40%
GOBP_MULTICELLULAR_ORGANISMAL_MOVEMENT	GOBP_MULTICELLULAR_ORGANISMAL_MOVEMENT		56	-0.441043	-1.51575	0.0176817	0.274814	0.99	14686	tags=54%, list=27%, signal=73%
GOCC_APICAL_DENDRITE	GOCC_APICAL_DENDRITE		18	-0.636343	-1.64957	0.0177515	0.210185	0.934	7602	tags=44%, list=14%, signal=52%
GOBP_ALPHA_AMINO_ACID_CATABOLIC_PROCESS	GOBP_ALPHA_AMINO_ACID_CATABOLIC_PROCESS		87	-0.437649	-1.5393	0.018	0.266246	0.988	14661	tags=51%, list=27%, signal=69%
GOBP_SYNAPTIC_TRANSMISSION_CHOLINERGIC	GOBP_SYNAPTIC_TRANSMISSION_CHOLINERGIC		28	-0.528899	-1.56541	0.0183299	0.251456	0.981	12817	tags=57%, list=23%, signal=74%
GOBP_POSITIVE_REGULATION_OF_SYNAPTIC_TRANSMISSION	GOBP_POSITIVE_REGULATION_OF_SYNAPTIC_TRANSMISSION		144	-0.48963	-1.60408	0.0183824	0.237542	0.966	12195	tags=49%, list=22%, signal=63%
GOBP_CELL_COMMUNICATION_INVOLVED_IN_CARDIAC_CONDUCTION	GOBP_CELL_COMMUNICATION_INVOLVED_IN_CARDIAC_CONDUCTION		57	-0.51932	-1.64966	0.0185185	0.211339	0.934	7959	tags=47%, list=14%, signal=55%
GOBP_NEGATIVE_REGULATION_OF_SECRETION	GOBP_NEGATIVE_REGULATION_OF_SECRETION		156	-0.373782	-1.443	0.0185529	0.337958	0.997	9158	tags=33%, list=17%, signal=40%
GOBP_GLUTAMATE_SECRETION	GOBP_GLUTAMATE_SECRETION		40	-0.5488	-1.66988	0.0190114	0.209085	0.912	6319	tags=43%, list=11%, signal=48%
GOCC_SYNAPTIC_MEMBRANE	GOCC_SYNAPTIC_MEMBRANE		368	-0.487336	-1.61047	0.0190114	0.232653	0.963	9150	tags=45%, list=17%, signal=54%
GOBP_RESPONSE_TO_AUDITORY_STIMULUS	GOBP_RESPONSE_TO_AUDITORY_STIMULUS		23	-0.607072	-1.61495	0.019084	0.230012	0.961	9158	tags=57%, list=17%, signal=68%
GOBP_NEURON_CELL_CELL_ADHESION	GOBP_NEURON_CELL_CELL_ADHESION		17	-0.731047	-1.64222	0.0191939	0.211182	0.938	12829	tags=88%, list=23%, signal=115%
GOBP_REGULATION_OF_SYNAPTIC_VESICLE_ENDOCYTOSIS	GOBP_REGULATION_OF_SYNAPTIC_VESICLE_ENDOCYTOSIS		15	-0.663005	-1.53904	0.0191939	0.265984	0.988	8317	tags=53%, list=15%, signal=63%
GOBP_SENSORY_PERCEPTION_OF_LIGHT_STIMULUS	GOBP_SENSORY_PERCEPTION_OF_LIGHT_STIMULUS		218	-0.381516	-1.42981	0.0191939	0.344512	0.998	15512	tags=44%, list=28%, signal=61%
GOBP_MALE_GENITALIA_DEVELOPMENT	GOBP_MALE_GENITALIA_DEVELOPMENT		20	-0.587418	-1.60545	0.0192678	0.236793	0.965	10812	tags=55%, list=20%, signal=68%
GOBP_NEGATIVE_REGULATION_OF_SMALL_MOLECULE_METABOLIC_PROCESS	GOBP_NEGATIVE_REGULATION_OF_SMALL_MOLECULE_METABOLIC_PROCESS		99	-0.382265	-1.46759	0.0192678	0.318871	0.996	9761	tags=33%, list=18%, signal=40%
GOBP_CATECHOL_CONTAINING_COMPOUND_METABOLIC_PROCESS	GOBP_CATECHOL_CONTAINING_COMPOUND_METABOLIC_PROCESS		52	-0.511338	-1.59871	0.0194553	0.234853	0.967	9041	tags=38%, list=16%, signal=46%
GOBP_ENDOCRINE_HORMONE_SECRETION	GOBP_ENDOCRINE_HORMONE_SECRETION		45	-0.499668	-1.56095	0.0194932	0.250258	0.982	11266	tags=44%, list=20%, signal=56%
GOMF_DIPEPTIDASE_ACTIVITY	GOMF_DIPEPTIDASE_ACTIVITY		15	-0.650972	-1.5808	0.0195312	0.249673	0.974	10061	tags=53%, list=18%, signal=65%
GOBP_PEPTIDE_HORMONE_SECRETION	GOBP_PEPTIDE_HORMONE_SECRETION		247	-0.421239	-1.51694	0.0195312	0.274594	0.99	9591	tags=39%, list=17%, signal=47%
GOBP_DENDRITE_EXTENSION	GOBP_DENDRITE_EXTENSION		36	-0.569687	-1.62629	0.0196078	0.22237	0.95	12551	tags=58%, list=23%, signal=75%
GOBP_NITRIC_OXIDE_MEDIATED_SIGNAL_TRANSDUCTION	GOBP_NITRIC_OXIDE_MEDIATED_SIGNAL_TRANSDUCTION		27	-0.563169	-1.60118	0.0197628	0.236981	0.966	11266	tags=59%, list=20%, signal=74%
GOMF_ION_CHANNEL_REGULATOR_ACTIVITY	GOMF_ION_CHANNEL_REGULATOR_ACTIVITY		116	-0.378766	-1.44248	0.019802	0.3365	0.997	9512	tags=33%, list=17%, signal=39%
GOMF_METALLOCARBOXYPEPTIDASE_ACTIVITY	GOMF_METALLOCARBOXYPEPTIDASE_ACTIVITY		29	-0.541906	-1.56696	0.02	0.25009	0.98	13912	tags=55%, list=25%, signal=74%
GOBP_REGULATION_OF_MACROPHAGE_CHEMOTAXIS	GOBP_REGULATION_OF_MACROPHAGE_CHEMOTAXIS		27	-0.54155	-1.62132	0.020284	0.224548	0.959	10277	tags=59%, list=19%, signal=73%
GOBP_RETINAL_GANGLION_CELL_AXON_GUIDANCE	GOBP_RETINAL_GANGLION_CELL_AXON_GUIDANCE		19	-0.565648	-1.5801	0.0207939	0.250121	0.975	17926	tags=58%, list=32%, signal=86%
GOBP_PHOTORECEPTOR_CELL_DIFFERENTIATION	GOBP_PHOTORECEPTOR_CELL_DIFFERENTIATION		60	-0.458016	-1.51743	0.0207939	0.275025	0.99	14472	tags=53%, list=26%, signal=72%
GOMF_CALMODULIN_BINDING	GOMF_CALMODULIN_BINDING		198	-0.402467	-1.47208	0.0207939	0.316963	0.996	8948	tags=35%, list=16%, signal=41%
GOCC_DENDRITE_CYTOPLASM	GOCC_DENDRITE_CYTOPLASM		31	-0.612202	-1.62502	0.0208333	0.222631	0.952	9512	tags=55%, list=17%, signal=66%
GOBP_REGULATION_OF_VENTRICULAR_CARDIAC_MUSCLE_CELL_MEMBRANE_REPOLARIZATION	GOBP_REGULATION_OF_VENTRICULAR_CARDIAC_MUSCLE_CELL_MEMBRANE_REPOLARIZATION		21	-0.551502	-1.59283	0.0209125	0.237872	0.971	8836	tags=43%, list=16%, signal=51%
GOBP_PHOTORECEPTOR_CELL_DEVELOPMENT	GOBP_PHOTORECEPTOR_CELL_DEVELOPMENT		46	-0.48927	-1.55067	0.0209924	0.259302	0.984	9807	tags=46%, list=18%, signal=55%
GOBP_POSITIVE_REGULATION_OF_CALCIUM_ION_TRANSMEMBRANE_TRANSPORT	GOBP_POSITIVE_REGULATION_OF_CALCIUM_ION_TRANSMEMBRANE_TRANSPORT		70	-0.440657	-1.52403	0.0211946	0.275036	0.989	12388	tags=46%, list=22%, signal=59%
GOBP_INDOLE_CONTAINING_COMPOUND_METABOLIC_PROCESS	GOBP_INDOLE_CONTAINING_COMPOUND_METABOLIC_PROCESS		24	-0.547194	-1.58766	0.0213592	0.243493	0.972	11441	tags=54%, list=21%, signal=68%
GOBP_POSITIVE_REGULATION_OF_CYCLASE_ACTIVITY	GOBP_POSITIVE_REGULATION_OF_CYCLASE_ACTIVITY		21	-0.54177	-1.55088	0.0216607	0.26056	0.984	11103	tags=43%, list=20%, signal=54%
GOBP_CGMP_METABOLIC_PROCESS	GOBP_CGMP_METABOLIC_PROCESS		17	-0.690417	-1.65169	0.0218688	0.212548	0.933	15999	tags=82%, list=29%, signal=116%
GOBP_CELLULAR_RESPONSE_TO_ESTROGEN_STIMULUS	GOBP_CELLULAR_RESPONSE_TO_ESTROGEN_STIMULUS		15	-0.581694	-1.56166	0.0219124	0.249696	0.982	5671	tags=40%, list=10%, signal=45%
GOBP_CELLULAR_BIOGENIC_AMINE_METABOLIC_PROCESS	GOBP_CELLULAR_BIOGENIC_AMINE_METABOLIC_PROCESS		103	-0.404475	-1.46629	0.0219561	0.318861	0.996	9193	tags=37%, list=17%, signal=44%
GOBP_MYOBLAST_PROLIFERATION	GOBP_MYOBLAST_PROLIFERATION		22	-0.544552	-1.57576	0.0220441	0.251325	0.978	11231	tags=41%, list=20%, signal=51%
GOBP_REGULATION_OF_CYCLASE_ACTIVITY	GOBP_REGULATION_OF_CYCLASE_ACTIVITY		46	-0.480599	-1.53172	0.0221811	0.271594	0.988	11103	tags=46%, list=20%, signal=57%
GOBP_POSITIVE_REGULATION_OF_POTASSIUM_ION_TRANSPORT	GOBP_POSITIVE_REGULATION_OF_POTASSIUM_ION_TRANSPORT		45	-0.485178	-1.57654	0.0223048	0.252639	0.977	9394	tags=40%, list=17%, signal=48%
GOBP_REGULATION_OF_COLLATERAL_SPROUTING	GOBP_REGULATION_OF_COLLATERAL_SPROUTING		17	-0.562918	-1.55012	0.0224033	0.257988	0.984	4682	tags=41%, list=8%, signal=45%
GOBP_REGULATION_OF_STRIATED_MUSCLE_CONTRACTION	GOBP_REGULATION_OF_STRIATED_MUSCLE_CONTRACTION		90	-0.43603	-1.5507	0.022449	0.260076	0.984	9731	tags=43%, list=18%, signal=52%
GOMF_ATPASE_COUPLED_ION_TRANSMEMBRANE_TRANSPORTER_ACTIVITY	GOMF_ATPASE_COUPLED_ION_TRANSMEMBRANE_TRANSPORTER_ACTIVITY		46	-0.535902	-1.59464	0.0227273	0.23816	0.969	8313	tags=39%, list=15%, signal=46%
GOBP_NEGATIVE_REGULATION_OF_PEPTIDE_HORMONE_SECRETION	GOBP_NEGATIVE_REGULATION_OF_PEPTIDE_HORMONE_SECRETION		41	-0.489901	-1.50199	0.0227704	0.288113	0.992	9041	tags=39%, list=16%, signal=47%
GOBP_PEPTIDE_SECRETION	GOBP_PEPTIDE_SECRETION		397	-0.372237	-1.45222	0.0228137	0.333975	0.997	9591	tags=34%, list=17%, signal=41%
GOBP_DETECTION_OF_ABIOTIC_STIMULUS	GOBP_DETECTION_OF_ABIOTIC_STIMULUS		144	-0.371961	-1.41767	0.0228571	0.357785	0.999	11135	tags=39%, list=20%, signal=49%
GOBP_NEUROTRANSMITTER_SECRETION	GOBP_NEUROTRANSMITTER_SECRETION		155	-0.527469	-1.63839	0.0229008	0.215503	0.94	10202	tags=53%, list=18%, signal=65%
GOMF_PROTEIN_KINASE_C_ACTIVITY	GOMF_PROTEIN_KINASE_C_ACTIVITY		16	-0.573095	-1.52623	0.0229446	0.273489	0.989	8448	tags=44%, list=15%, signal=52%
GOCC_NEURON_TO_NEURON_SYNAPSE	GOCC_NEURON_TO_NEURON_SYNAPSE		342	-0.462163	-1.54634	0.0230326	0.258313	0.985	8650	tags=41%, list=16%, signal=48%
GOBP_REGULATION_OF_RESPONSE_TO_EXTRACELLULAR_STIMULUS	GOBP_REGULATION_OF_RESPONSE_TO_EXTRACELLULAR_STIMULUS		26	-0.52449	-1.52572	0.0230326	0.272956	0.989	12015	tags=50%, list=22%, signal=64%
GOBP_REGULATION_OF_CALCIUM_MEDIATED_SIGNALING	GOBP_REGULATION_OF_CALCIUM_MEDIATED_SIGNALING		66	-0.49352	-1.57653	0.0231214	0.251689	0.977	5320	tags=36%, list=10%, signal=40%
GOMF_INWARD_RECTIFIER_POTASSIUM_CHANNEL_ACTIVITY	GOMF_INWARD_RECTIFIER_POTASSIUM_CHANNEL_ACTIVITY		22	-0.571914	-1.61359	0.0232558	0.23061	0.962	9394	tags=50%, list=17%, signal=60%
GOBP_CARDIAC_MUSCLE_CELL_CONTRACTION	GOBP_CARDIAC_MUSCLE_CELL_CONTRACTION		71	-0.486864	-1.59227	0.0232558	0.237983	0.971	9731	tags=44%, list=18%, signal=53%
GOBP_ADRENERGIC_RECEPTOR_SIGNALING_PATHWAY	GOBP_ADRENERGIC_RECEPTOR_SIGNALING_PATHWAY		30	-0.568655	-1.56655	0.0233463	0.249963	0.98	16448	tags=53%, list=30%, signal=76%
GOBP_GLUTAMATE_RECEPTOR_SIGNALING_PATHWAY	GOBP_GLUTAMATE_RECEPTOR_SIGNALING_PATHWAY		53	-0.545987	-1.57932	0.0234375	0.250799	0.975	14920	tags=62%, list=27%, signal=85%
GOMF_CYCLIC_NUCLEOTIDE_PHOSPHODIESTERASE_ACTIVITY	GOMF_CYCLIC_NUCLEOTIDE_PHOSPHODIESTERASE_ACTIVITY		25	-0.612212	-1.63875	0.0236686	0.215995	0.94	9731	tags=68%, list=18%, signal=82%
GOBP_EXCRETION	GOBP_EXCRETION		60	-0.409541	-1.42802	0.0237154	0.346452	0.999	18326	tags=53%, list=33%, signal=80%
GOBP_NEGATIVE_REGULATION_OF_PEPTIDE_SECRETION	GOBP_NEGATIVE_REGULATION_OF_PEPTIDE_SECRETION		72	-0.417341	-1.48111	0.0242086	0.306525	0.996	8034	tags=33%, list=15%, signal=39%
GOBP_CELLULAR_AMINO_ACID_CATABOLIC_PROCESS	GOBP_CELLULAR_AMINO_ACID_CATABOLIC_PROCESS		105	-0.425508	-1.48823	0.0242424	0.301315	0.995	14661	tags=50%, list=27%, signal=67%
GOBP_REGULATION_OF_NEUROTRANSMITTER_TRANSPORT	GOBP_REGULATION_OF_NEUROTRANSMITTER_TRANSPORT		99	-0.517149	-1.62471	0.0242991	0.222223	0.953	12222	tags=54%, list=22%, signal=69%
GOBP_REGULATION_OF_EXOCYTOSIS	GOBP_REGULATION_OF_EXOCYTOSIS		197	-0.435953	-1.50264	0.0245283	0.288236	0.992	9732	tags=42%, list=18%, signal=50%
GOBP_REGULATION_OF_NERVOUS_SYSTEM_PROCESS	GOBP_REGULATION_OF_NERVOUS_SYSTEM_PROCESS		137	-0.455708	-1.55481	0.0245747	0.256792	0.983	6553	tags=36%, list=12%, signal=41%
GOMF_G_PROTEIN_COUPLED_RECEPTOR_BINDING	GOMF_G_PROTEIN_COUPLED_RECEPTOR_BINDING		287	-0.361828	-1.39435	0.0245747	0.377249	0.999	9775	tags=31%, list=18%, signal=37%
GOBP_REGULATION_OF_MACROPHAGE_MIGRATION	GOBP_REGULATION_OF_MACROPHAGE_MIGRATION		38	-0.543575	-1.61723	0.0246407	0.227512	0.961	10277	tags=58%, list=19%, signal=71%
GOBP_OVULATION_CYCLE_PROCESS	GOBP_OVULATION_CYCLE_PROCESS		43	-0.527685	-1.54234	0.0246679	0.261454	0.987	11235	tags=56%, list=20%, signal=70%
GOCC_NEURON_PROJECTION_MEMBRANE	GOCC_NEURON_PROJECTION_MEMBRANE		59	-0.555259	-1.60856	0.025	0.231128	0.963	13916	tags=61%, list=25%, signal=81%
GOBP_DOPAMINE_METABOLIC_PROCESS	GOBP_DOPAMINE_METABOLIC_PROCESS		38	-0.493089	-1.50993	0.025	0.281133	0.99	9041	tags=37%, list=16%, signal=44%
GOBP_REGULATION_OF_RELEASE_OF_SEQUESTERED_CALCIUM_ION_INTO_CYTOSOL	GOBP_REGULATION_OF_RELEASE_OF_SEQUESTERED_CALCIUM_ION_INTO_CYTOSOL		75	-0.47646	-1.53755	0.0250965	0.267259	0.988	7602	tags=40%, list=14%, signal=46%
GOCC_NEUROTRANSMITTER_RECEPTOR_COMPLEX	GOCC_NEUROTRANSMITTER_RECEPTOR_COMPLEX		50	-0.556098	-1.56772	0.0252427	0.252052	0.98	14033	tags=60%, list=25%, signal=80%
GOBP_MEMBRANE_REPOLARIZATION_DURING_VENTRICULAR_CARDIAC_MUSCLE_CELL_ACTION_POTENTIAL	GOBP_MEMBRANE_REPOLARIZATION_DURING_VENTRICULAR_CARDIAC_MUSCLE_CELL_ACTION_POTENTIAL		15	-0.602754	-1.60388	0.0252918	0.236884	0.966	3119	tags=33%, list=6%, signal=35%
GOBP_REGULATION_OF_MEMBRANE_DEPOLARIZATION	GOBP_REGULATION_OF_MEMBRANE_DEPOLARIZATION		44	-0.457391	-1.51919	0.0253906	0.275711	0.989	8397	tags=36%, list=15%, signal=43%
GOBP_DEVELOPMENTAL_MATURATION	GOBP_DEVELOPMENTAL_MATURATION		267	-0.380966	-1.43883	0.0254902	0.340312	0.997	10467	tags=37%, list=19%, signal=45%
GOCC_ACETYLCHOLINE_GATED_CHANNEL_COMPLEX	GOCC_ACETYLCHOLINE_GATED_CHANNEL_COMPLEX		16	-0.634715	-1.54322	0.0255403	0.260589	0.987	16505	tags=75%, list=30%, signal=107%
GOCC_DENDRITE_MEMBRANE	GOCC_DENDRITE_MEMBRANE		43	-0.591134	-1.61029	0.025641	0.230813	0.963	13388	tags=63%, list=24%, signal=83%
GOBP_POSITIVE_REGULATION_OF_ACUTE_INFLAMMATORY_RESPONSE	GOBP_POSITIVE_REGULATION_OF_ACUTE_INFLAMMATORY_RESPONSE		26	-0.551285	-1.62746	0.026	0.223461	0.947	11135	tags=50%, list=20%, signal=63%
GOBP_PHASIC_SMOOTH_MUSCLE_CONTRACTION	GOBP_PHASIC_SMOOTH_MUSCLE_CONTRACTION		22	-0.575447	-1.56307	0.0261044	0.251011	0.982	10812	tags=59%, list=20%, signal=73%
GOBP_PEPTIDYL_ARGININE_MODIFICATION	GOBP_PEPTIDYL_ARGININE_MODIFICATION		27	-0.488144	-1.49666	0.0261569	0.292866	0.993	9397	tags=41%, list=17%, signal=49%
GOBP_NEGATIVE_REGULATION_OF_ANION_TRANSPORT	GOBP_NEGATIVE_REGULATION_OF_ANION_TRANSPORT		208	-0.360744	-1.42073	0.0261682	0.355549	0.999	9145	tags=30%, list=17%, signal=36%
GOCC_PRESYNAPTIC_MEMBRANE	GOCC_PRESYNAPTIC_MEMBRANE		137	-0.503944	-1.62695	0.0264151	0.223238	0.948	9041	tags=47%, list=16%, signal=57%
GOBP_LONG_TERM_MEMORY	GOBP_LONG_TERM_MEMORY		32	-0.526709	-1.50995	0.0266667	0.281804	0.99	12715	tags=56%, list=23%, signal=73%
GOBP_SYNAPTIC_VESICLE_EXOCYTOSIS	GOBP_SYNAPTIC_VESICLE_EXOCYTOSIS		104	-0.537541	-1.62422	0.0267176	0.222014	0.953	10202	tags=54%, list=18%, signal=66%
GOBP_AMMONIUM_ION_METABOLIC_PROCESS	GOBP_AMMONIUM_ION_METABOLIC_PROCESS		25	-0.537864	-1.55242	0.0271845	0.2592	0.983	8317	tags=48%, list=15%, signal=56%
GOBP_POSITIVE_REGULATION_OF_CALCIUM_ION_TRANSPORT_INTO_CYTOSOL	GOBP_POSITIVE_REGULATION_OF_CALCIUM_ION_TRANSPORT_INTO_CYTOSOL		53	-0.458264	-1.49721	0.0272374	0.293177	0.992	11956	tags=47%, list=22%, signal=60%
GOBP_TEMPERATURE_HOMEOSTASIS	GOBP_TEMPERATURE_HOMEOSTASIS		171	-0.396336	-1.46753	0.027668	0.318321	0.996	12821	tags=42%, list=23%, signal=54%
GOMF_CARBOXYPEPTIDASE_ACTIVITY	GOMF_CARBOXYPEPTIDASE_ACTIVITY		42	-0.524154	-1.57491	0.0277778	0.252082	0.978	14243	tags=55%, list=26%, signal=74%
GOBP_CD4_POSITIVE_OR_CD8_POSITIVE_ALPHA_BETA_T_CELL_LINEAGE_COMMITMENT	GOBP_CD4_POSITIVE_OR_CD8_POSITIVE_ALPHA_BETA_T_CELL_LINEAGE_COMMITMENT		22	-0.695543	-1.66942	0.0278884	0.20534	0.913	6779	tags=59%, list=12%, signal=67%
GOBP_MACROPHAGE_MIGRATION	GOBP_MACROPHAGE_MIGRATION		52	-0.506718	-1.60541	0.0278884	0.235818	0.965	10277	tags=56%, list=19%, signal=68%
GOBP_REGULATION_OF_DENDRITE_EXTENSION	GOBP_REGULATION_OF_DENDRITE_EXTENSION		27	-0.592962	-1.59951	0.028	0.238365	0.967	9688	tags=52%, list=18%, signal=63%
GOBP_NEUROTRANSMITTER_UPTAKE	GOBP_NEUROTRANSMITTER_UPTAKE		38	-0.490895	-1.52073	0.0280374	0.276807	0.989	11972	tags=50%, list=22%, signal=64%
GOCC_GTPASE_COMPLEX	GOCC_GTPASE_COMPLEX		33	-0.555488	-1.56509	0.0280899	0.251127	0.981	6605	tags=42%, list=12%, signal=48%
GOCC_EXCITATORY_SYNAPSE	GOCC_EXCITATORY_SYNAPSE		46	-0.553477	-1.58647	0.0282486	0.245193	0.972	7944	tags=48%, list=14%, signal=56%
GOCC_DENDRITIC_SHAFT	GOCC_DENDRITIC_SHAFT		32	-0.562273	-1.57827	0.0283019	0.250018	0.975	7552	tags=56%, list=14%, signal=65%
GOBP_RETINA_DEVELOPMENT_IN_CAMERA_TYPE_EYE	GOBP_RETINA_DEVELOPMENT_IN_CAMERA_TYPE_EYE		145	-0.428199	-1.52935	0.028463	0.272606	0.988	9807	tags=38%, list=18%, signal=46%
GOBP_AROMATIC_AMINO_ACID_FAMILY_METABOLIC_PROCESS	GOBP_AROMATIC_AMINO_ACID_FAMILY_METABOLIC_PROCESS		32	-0.48129	-1.49897	0.0286299	0.291524	0.992	14304	tags=53%, list=26%, signal=72%
GOBP_MHC_CLASS_II_BIOSYNTHETIC_PROCESS	GOBP_MHC_CLASS_II_BIOSYNTHETIC_PROCESS		17	-0.66198	-1.60995	0.0289017	0.22933	0.963	10407	tags=47%, list=19%, signal=58%
GOCC_DENDRITIC_SPINE_MEMBRANE	GOCC_DENDRITIC_SPINE_MEMBRANE		15	-0.687724	-1.57029	0.0290698	0.250373	0.98	13388	tags=87%, list=24%, signal=114%
GOMF_ADRENERGIC_RECEPTOR_BINDING	GOMF_ADRENERGIC_RECEPTOR_BINDING		20	-0.572803	-1.57416	0.0291971	0.251594	0.978	7001	tags=40%, list=13%, signal=46%
GOBP_REGULATION_OF_SODIUM_ION_TRANSMEMBRANE_TRANSPORTER_ACTIVITY	GOBP_REGULATION_OF_SODIUM_ION_TRANSMEMBRANE_TRANSPORTER_ACTIVITY		54	-0.466638	-1.5476	0.0293542	0.259803	0.985	8616	tags=43%, list=16%, signal=50%
GOBP_REGULATION_OF_SYNAPTIC_VESICLE_RECYCLING	GOBP_REGULATION_OF_SYNAPTIC_VESICLE_RECYCLING		23	-0.600031	-1.52304	0.0293542	0.2756	0.989	13280	tags=61%, list=24%, signal=80%
GOBP_NEGATIVE_REGULATION_OF_LIPID_METABOLIC_PROCESS	GOBP_NEGATIVE_REGULATION_OF_LIPID_METABOLIC_PROCESS		100	-0.378243	-1.40404	0.029703	0.36652	0.999	14654	tags=45%, list=26%, signal=61%
GOMF_ACETYLCHOLINE_RECEPTOR_ACTIVITY	GOMF_ACETYLCHOLINE_RECEPTOR_ACTIVITY		22	-0.585063	-1.52656	0.0300601	0.273647	0.989	12817	tags=59%, list=23%, signal=77%
GOCC_INTRINSIC_COMPONENT_OF_POSTSYNAPTIC_MEMBRANE	GOCC_INTRINSIC_COMPONENT_OF_POSTSYNAPTIC_MEMBRANE		105	-0.543163	-1.63158	0.0307692	0.221103	0.944	13727	tags=63%, list=25%, signal=83%
GOCC_NEURON_PROJECTION_TERMINUS	GOCC_NEURON_PROJECTION_TERMINUS		130	-0.487072	-1.54861	0.0307692	0.260315	0.985	9375	tags=45%, list=17%, signal=54%
GOMF_AMYLOID_BETA_BINDING	GOMF_AMYLOID_BETA_BINDING		84	-0.462578	-1.48269	0.0307692	0.305793	0.995	11445	tags=48%, list=21%, signal=60%
GOBP_ACTIN_FILAMENT_BASED_MOVEMENT	GOBP_ACTIN_FILAMENT_BASED_MOVEMENT		149	-0.392021	-1.46157	0.0307692	0.325593	0.996	8836	tags=34%, list=16%, signal=41%
GOBP_SIALYLATION	GOBP_SIALYLATION		20	-0.578822	-1.56062	0.030888	0.25011	0.982	5888	tags=45%, list=11%, signal=50%
GOBP_REGULATION_OF_CARDIAC_MUSCLE_CONTRACTION	GOBP_REGULATION_OF_CARDIAC_MUSCLE_CONTRACTION		74	-0.422862	-1.45732	0.03125	0.33063	0.997	9731	tags=43%, list=18%, signal=52%
GOBP_POSITIVE_REGULATION_OF_COLD_INDUCED_THERMOGENESIS	GOBP_POSITIVE_REGULATION_OF_COLD_INDUCED_THERMOGENESIS		97	-0.393267	-1.44536	0.03125	0.338807	0.997	8927	tags=34%, list=16%, signal=40%
GOBP_NEGATIVE_REGULATION_OF_ORGANIC_ACID_TRANSPORT	GOBP_NEGATIVE_REGULATION_OF_ORGANIC_ACID_TRANSPORT		20	-0.505157	-1.45313	0.0317797	0.332687	0.997	11872	tags=50%, list=21%, signal=64%
GOBP_REGULATION_OF_URINE_VOLUME	GOBP_REGULATION_OF_URINE_VOLUME		21	-0.502724	-1.47714	0.0318725	0.3099	0.996	5007	tags=33%, list=9%, signal=37%
GOBP_AMINO_ACID_TRANSPORT	GOBP_AMINO_ACID_TRANSPORT		152	-0.386507	-1.41104	0.0319549	0.360907	0.999	9315	tags=35%, list=17%, signal=42%
GOBP_REGULATION_OF_PRESYNAPTIC_CYTOSOLIC_CALCIUM_ION_CONCENTRATION	GOBP_REGULATION_OF_PRESYNAPTIC_CYTOSOLIC_CALCIUM_ION_CONCENTRATION		16	-0.606975	-1.54221	0.0323232	0.26094	0.987	11872	tags=69%, list=21%, signal=88%
GOCC_ANCHORED_COMPONENT_OF_MEMBRANE	GOCC_ANCHORED_COMPONENT_OF_MEMBRANE		169	-0.331599	-1.33679	0.0323232	0.408536	1	9649	tags=32%, list=17%, signal=39%
GOBP_POSITIVE_REGULATION_OF_CALCIUM_ION_DEPENDENT_EXOCYTOSIS	GOBP_POSITIVE_REGULATION_OF_CALCIUM_ION_DEPENDENT_EXOCYTOSIS		19	-0.691528	-1.6033	0.0323887	0.236917	0.966	8062	tags=68%, list=15%, signal=80%
GOBP_REGULATION_OF_GLUCOSE_METABOLIC_PROCESS	GOBP_REGULATION_OF_GLUCOSE_METABOLIC_PROCESS		119	-0.383131	-1.43685	0.0325048	0.339527	0.997	11295	tags=39%, list=20%, signal=50%
GOBP_NEUROTROPHIN_TRK_RECEPTOR_SIGNALING_PATHWAY	GOBP_NEUROTROPHIN_TRK_RECEPTOR_SIGNALING_PATHWAY		32	-0.514261	-1.52094	0.0326923	0.277069	0.989	12557	tags=47%, list=23%, signal=61%
GOBP_DETECTION_OF_CHEMICAL_STIMULUS	GOBP_DETECTION_OF_CHEMICAL_STIMULUS		500	-0.28864	-1.3323	0.0330578	0.41071	1	22535	tags=34%, list=41%, signal=58%
GOBP_POSITIVE_REGULATION_OF_RECEPTOR_SIGNALING_PATHWAY_VIA_STAT	GOBP_POSITIVE_REGULATION_OF_RECEPTOR_SIGNALING_PATHWAY_VIA_STAT		48	-0.491008	-1.52019	0.0332681	0.274306	0.989	14688	tags=58%, list=27%, signal=79%
GOBP_METAL_ION_EXPORT	GOBP_METAL_ION_EXPORT		47	-0.468884	-1.48819	0.0332717	0.300692	0.995	4835	tags=34%, list=9%, signal=37%
GOCC_DENSE_CORE_GRANULE	GOCC_DENSE_CORE_GRANULE		28	-0.626956	-1.56205	0.0334646	0.250607	0.982	11864	tags=75%, list=21%, signal=95%
GOMF_TASTE_RECEPTOR_ACTIVITY	GOMF_TASTE_RECEPTOR_ACTIVITY		26	-0.550339	-1.57904	0.0338983	0.250402	0.975	18379	tags=62%, list=33%, signal=92%
GOBP_REGULATION_OF_NEUROTRANSMITTER_RECEPTOR_ACTIVITY	GOBP_REGULATION_OF_NEUROTRANSMITTER_RECEPTOR_ACTIVITY		80	-0.493899	-1.54707	0.0340265	0.259259	0.985	8836	tags=43%, list=16%, signal=51%
GOBP_REGULATION_OF_SODIUM_ION_TRANSMEMBRANE_TRANSPORT	GOBP_REGULATION_OF_SODIUM_ION_TRANSMEMBRANE_TRANSPORT		64	-0.433861	-1.51127	0.0343511	0.280344	0.99	8616	tags=41%, list=16%, signal=48%
GOBP_CALCIUM_MEDIATED_SIGNALING_USING_INTRACELLULAR_CALCIUM_SOURCE	GOBP_CALCIUM_MEDIATED_SIGNALING_USING_INTRACELLULAR_CALCIUM_SOURCE		22	-0.535305	-1.52914	0.034413	0.272303	0.988	6558	tags=36%, list=12%, signal=41%
GOCC_INTRINSIC_COMPONENT_OF_PRESYNAPTIC_MEMBRANE	GOCC_INTRINSIC_COMPONENT_OF_PRESYNAPTIC_MEMBRANE		64	-0.501826	-1.55556	0.0344168	0.256132	0.982	10800	tags=53%, list=20%, signal=66%
GOCC_MAIN_AXON	GOCC_MAIN_AXON		61	-0.548554	-1.59517	0.034749	0.240163	0.969	9533	tags=51%, list=17%, signal=61%
GOBP_REGULATION_OF_CALCIUM_ION_TRANSMEMBRANE_TRANSPORTER_ACTIVITY	GOBP_REGULATION_OF_CALCIUM_ION_TRANSMEMBRANE_TRANSPORTER_ACTIVITY		82	-0.467813	-1.55353	0.034749	0.257694	0.983	10517	tags=43%, list=19%, signal=53%
GOBP_POSITIVE_REGULATION_OF_BEHAVIOR	GOBP_POSITIVE_REGULATION_OF_BEHAVIOR		26	-0.505894	-1.46615	0.034749	0.318507	0.996	11448	tags=42%, list=21%, signal=53%
GOBP_REGULATION_OF_BEHAVIOR	GOBP_REGULATION_OF_BEHAVIOR		65	-0.459488	-1.4881	0.0359168	0.300201	0.995	15081	tags=54%, list=27%, signal=74%
GOBP_MUSCLE_SYSTEM_PROCESS	GOBP_MUSCLE_SYSTEM_PROCESS		442	-0.393608	-1.48166	0.0359281	0.306058	0.996	9465	tags=36%, list=17%, signal=43%
GOBP_REGULATION_OF_VESICLE_FUSION	GOBP_REGULATION_OF_VESICLE_FUSION		24	-0.580047	-1.56312	0.0361905	0.251766	0.982	8062	tags=58%, list=15%, signal=68%
GOBP_REGULATION_OF_SYNAPTIC_PLASTICITY	GOBP_REGULATION_OF_SYNAPTIC_PLASTICITY		176	-0.472431	-1.5306	0.0361905	0.272311	0.988	9073	tags=44%, list=16%, signal=52%
GOBP_RECEPTOR_CLUSTERING	GOBP_RECEPTOR_CLUSTERING		52	-0.442624	-1.42193	0.0363289	0.353621	0.999	6248	tags=35%, list=11%, signal=39%
GOBP_REGULATION_OF_HEART_RATE_BY_CARDIAC_CONDUCTION	GOBP_REGULATION_OF_HEART_RATE_BY_CARDIAC_CONDUCTION		39	-0.546991	-1.58983	0.0365385	0.242036	0.972	9394	tags=54%, list=17%, signal=65%
GOBP_ACIDIC_AMINO_ACID_TRANSPORT	GOBP_ACIDIC_AMINO_ACID_TRANSPORT		67	-0.425748	-1.45461	0.0367647	0.332262	0.997	9315	tags=43%, list=17%, signal=52%
GOBP_CALCIUM_ION_REGULATED_EXOCYTOSIS_OF_NEUROTRANSMITTER	GOBP_CALCIUM_ION_REGULATED_EXOCYTOSIS_OF_NEUROTRANSMITTER		17	-0.63154	-1.51207	0.0368098	0.280103	0.99	5528	tags=41%, list=10%, signal=46%
GOMF_NEUROPEPTIDE_HORMONE_ACTIVITY	GOMF_NEUROPEPTIDE_HORMONE_ACTIVITY		30	-0.524853	-1.4923	0.0368098	0.299239	0.994	15081	tags=57%, list=27%, signal=78%
GOBP_REGULATION_OF_ACUTE_INFLAMMATORY_RESPONSE	GOBP_REGULATION_OF_ACUTE_INFLAMMATORY_RESPONSE		47	-0.475684	-1.57382	0.0372549	0.249491	0.978	11872	tags=53%, list=21%, signal=68%
GOCC_INTRINSIC_COMPONENT_OF_SYNAPTIC_MEMBRANE	GOCC_INTRINSIC_COMPONENT_OF_SYNAPTIC_MEMBRANE		140	-0.505634	-1.55751	0.0372549	0.254786	0.982	9041	tags=49%, list=16%, signal=58%
GOMF_CYTOKINE_RECEPTOR_ACTIVITY	GOMF_CYTOKINE_RECEPTOR_ACTIVITY		97	-0.558539	-1.63057	0.0374016	0.221968	0.945	7629	tags=49%, list=14%, signal=57%
GOBP_RELAXATION_OF_MUSCLE	GOBP_RELAXATION_OF_MUSCLE		32	-0.510447	-1.50667	0.0374753	0.284668	0.991	12321	tags=53%, list=22%, signal=68%
GOBP_PHAGOSOME_MATURATION	GOBP_PHAGOSOME_MATURATION		46	-0.517561	-1.56852	0.0379507	0.251271	0.98	8400	tags=37%, list=15%, signal=44%
GOBP_BIOLOGICAL_PROCESS_INVOLVED_IN_INTRASPECIES_INTERACTION_BETWEEN_ORGANISMS	GOBP_BIOLOGICAL_PROCESS_INVOLVED_IN_INTRASPECIES_INTERACTION_BETWEEN_ORGANISMS		52	-0.484309	-1.48473	0.0380228	0.303622	0.995	14686	tags=56%, list=27%, signal=76%
GOCC_PRESYNAPTIC_ACTIVE_ZONE	GOCC_PRESYNAPTIC_ACTIVE_ZONE		70	-0.502791	-1.54513	0.0380952	0.258403	0.986	12195	tags=54%, list=22%, signal=70%
GOBP_SEROTONIN_TRANSPORT	GOBP_SEROTONIN_TRANSPORT		20	-0.553997	-1.50153	0.0380952	0.28771	0.992	9145	tags=55%, list=17%, signal=66%
GOMF_SIALYLTRANSFERASE_ACTIVITY	GOMF_SIALYLTRANSFERASE_ACTIVITY		21	-0.558832	-1.53065	0.0384615	0.272964	0.988	5888	tags=43%, list=11%, signal=48%
GOBP_NOREPINEPHRINE_TRANSPORT	GOBP_NOREPINEPHRINE_TRANSPORT		24	-0.548867	-1.51689	0.0386965	0.273977	0.99	10202	tags=50%, list=18%, signal=61%
GOBP_NEUROTROPHIN_SIGNALING_PATHWAY	GOBP_NEUROTROPHIN_SIGNALING_PATHWAY		38	-0.526466	-1.5232	0.038835	0.275991	0.989	7451	tags=37%, list=13%, signal=43%
GOBP_RAB_PROTEIN_SIGNAL_TRANSDUCTION	GOBP_RAB_PROTEIN_SIGNAL_TRANSDUCTION		21	-0.594979	-1.50622	0.038835	0.285007	0.991	13290	tags=62%, list=24%, signal=81%
GOMF_GABA_RECEPTOR_BINDING	GOMF_GABA_RECEPTOR_BINDING		17	-0.667678	-1.54513	0.039548	0.259178	0.986	9741	tags=59%, list=18%, signal=71%
GOBP_POSITIVE_REGULATION_OF_CELLULAR_CARBOHYDRATE_METABOLIC_PROCESS	GOBP_POSITIVE_REGULATION_OF_CELLULAR_CARBOHYDRATE_METABOLIC_PROCESS		54	-0.416142	-1.39735	0.039604	0.373893	0.999	11956	tags=46%, list=22%, signal=59%
GOBP_REGULATION_OF_VASOCONSTRICTION	GOBP_REGULATION_OF_VASOCONSTRICTION		60	-0.433844	-1.41108	0.0397614	0.361442	0.999	7888	tags=35%, list=14%, signal=41%
GOBP_VOCALIZATION_BEHAVIOR	GOBP_VOCALIZATION_BEHAVIOR		20	-0.605739	-1.53394	0.0398482	0.270777	0.988	9158	tags=65%, list=17%, signal=78%
GOBP_T_HELPER_CELL_LINEAGE_COMMITMENT	GOBP_T_HELPER_CELL_LINEAGE_COMMITMENT		17	-0.683498	-1.57045	0.0402414	0.25094	0.98	6779	tags=59%, list=12%, signal=67%
GOBP_PHOSPHATIDYLINOSITOL_DEPHOSPHORYLATION	GOBP_PHOSPHATIDYLINOSITOL_DEPHOSPHORYLATION		31	-0.609101	-1.56352	0.0403071	0.251781	0.982	7806	tags=52%, list=14%, signal=60%
GOMF_SYNTAXIN_BINDING	GOMF_SYNTAXIN_BINDING		77	-0.500507	-1.52046	0.0403846	0.275971	0.989	9932	tags=48%, list=18%, signal=58%
GOBP_MEGAKARYOCYTE_DEVELOPMENT	GOBP_MEGAKARYOCYTE_DEVELOPMENT		16	-0.685394	-1.56255	0.040568	0.251197	0.982	9287	tags=50%, list=17%, signal=60%
GOBP_ACTIVATION_OF_PHOSPHOLIPASE_C_ACTIVITY	GOBP_ACTIVATION_OF_PHOSPHOLIPASE_C_ACTIVITY		32	-0.546872	-1.57407	0.040619	0.250855	0.978	7888	tags=50%, list=14%, signal=58%
GOBP_POSITIVE_REGULATION_OF_NEUROTRANSMITTER_TRANSPORT	GOBP_POSITIVE_REGULATION_OF_NEUROTRANSMITTER_TRANSPORT		22	-0.617206	-1.56717	0.040619	0.250576	0.98	12195	tags=64%, list=22%, signal=82%
GOBP_MAST_CELL_ACTIVATION_INVOLVED_IN_IMMUNE_RESPONSE	GOBP_MAST_CELL_ACTIVATION_INVOLVED_IN_IMMUNE_RESPONSE		47	-0.557367	-1.59901	0.0406977	0.236332	0.967	9073	tags=49%, list=16%, signal=58%
GOBP_NEURON_CELLULAR_HOMEOSTASIS	GOBP_NEURON_CELLULAR_HOMEOSTASIS		33	-0.508708	-1.49628	0.0416667	0.292218	0.993	11872	tags=52%, list=21%, signal=66%
GOBP_REGULATION_OF_MICROTUBULE_BASED_MOVEMENT	GOBP_REGULATION_OF_MICROTUBULE_BASED_MOVEMENT		50	-0.521812	-1.51347	0.0419048	0.278883	0.99	12500	tags=56%, list=23%, signal=72%
GOCC_PRESYNAPSE	GOCC_PRESYNAPSE		487	-0.435888	-1.50805	0.0419048	0.282654	0.991	9204	tags=42%, list=17%, signal=50%
GOBP_NEGATIVE_REGULATION_OF_CELLULAR_RESPONSE_TO_INSULIN_STIMULUS	GOBP_NEGATIVE_REGULATION_OF_CELLULAR_RESPONSE_TO_INSULIN_STIMULUS		39	-0.456541	-1.46994	0.0419048	0.318732	0.996	9287	tags=41%, list=17%, signal=49%
GOBP_REGULATION_OF_NEURONAL_SYNAPTIC_PLASTICITY	GOBP_REGULATION_OF_NEURONAL_SYNAPTIC_PLASTICITY		44	-0.546283	-1.55029	0.042065	0.258463	0.984	9073	tags=55%, list=16%, signal=65%
GOBP_LYSOSOME_LOCALIZATION	GOBP_LYSOSOME_LOCALIZATION		74	-0.497375	-1.54714	0.0422265	0.259971	0.985	12609	tags=49%, list=23%, signal=63%
GOBP_INDOLALKYLAMINE_METABOLIC_PROCESS	GOBP_INDOLALKYLAMINE_METABOLIC_PROCESS		17	-0.545116	-1.49747	0.0422265	0.293317	0.992	11441	tags=59%, list=21%, signal=74%
GOBP_POSITIVE_REGULATION_OF_SMOOTH_MUSCLE_CELL_DIFFERENTIATION	GOBP_POSITIVE_REGULATION_OF_SMOOTH_MUSCLE_CELL_DIFFERENTIATION		16	-0.595156	-1.49372	0.0422535	0.297054	0.994	17328	tags=63%, list=31%, signal=91%
GOBP_WALKING_BEHAVIOR	GOBP_WALKING_BEHAVIOR		25	-0.555328	-1.46711	0.0423892	0.318519	0.996	6775	tags=44%, list=12%, signal=50%
GOBP_REGULATION_OF_RECEPTOR_SIGNALING_PATHWAY_VIA_STAT	GOBP_REGULATION_OF_RECEPTOR_SIGNALING_PATHWAY_VIA_STAT		109	-0.421528	-1.46149	0.042471	0.325084	0.996	14688	tags=42%, list=27%, signal=57%
GOBP_NEURAL_RETINA_DEVELOPMENT	GOBP_NEURAL_RETINA_DEVELOPMENT		70	-0.434026	-1.48042	0.0425532	0.306622	0.996	11653	tags=46%, list=21%, signal=58%
GOBP_PHENOL_CONTAINING_COMPOUND_METABOLIC_PROCESS	GOBP_PHENOL_CONTAINING_COMPOUND_METABOLIC_PROCESS		106	-0.407257	-1.43248	0.0428016	0.340684	0.998	11570	tags=41%, list=21%, signal=51%
GOBP_MEMORY	GOBP_MEMORY		107	-0.439729	-1.45073	0.0434783	0.333894	0.997	9041	tags=40%, list=16%, signal=48%
GOMF_SULFATE_TRANSMEMBRANE_TRANSPORTER_ACTIVITY	GOMF_SULFATE_TRANSMEMBRANE_TRANSPORTER_ACTIVITY		17	-0.544647	-1.44992	0.0436508	0.334291	0.997	21196	tags=71%, list=38%, signal=114%
GOBP_POSITIVE_REGULATION_OF_LIPASE_ACTIVITY	GOBP_POSITIVE_REGULATION_OF_LIPASE_ACTIVITY		73	-0.456751	-1.52697	0.0437262	0.273566	0.989	9351	tags=40%, list=17%, signal=48%
GOBP_NEURON_MIGRATION	GOBP_NEURON_MIGRATION		145	-0.423288	-1.43723	0.0437262	0.339386	0.997	14688	tags=54%, list=27%, signal=73%
GOMF_NEUROPEPTIDE_RECEPTOR_ACTIVITY	GOMF_NEUROPEPTIDE_RECEPTOR_ACTIVITY		44	-0.512258	-1.53512	0.0437376	0.269133	0.988	16474	tags=57%, list=30%, signal=81%
GOBP_RETINA_MORPHOGENESIS_IN_CAMERA_TYPE_EYE	GOBP_RETINA_MORPHOGENESIS_IN_CAMERA_TYPE_EYE		58	-0.445231	-1.48903	0.0440613	0.301852	0.995	11653	tags=45%, list=21%, signal=57%
GOBP_POSITIVE_REGULATION_OF_CALCIUM_ION_TRANSMEMBRANE_TRANSPORTER_ACTIVITY	GOBP_POSITIVE_REGULATION_OF_CALCIUM_ION_TRANSMEMBRANE_TRANSPORTER_ACTIVITY		37	-0.479708	-1.47429	0.0442656	0.313058	0.996	12388	tags=51%, list=22%, signal=66%
GOBP_T_CELL_LINEAGE_COMMITMENT	GOBP_T_CELL_LINEAGE_COMMITMENT		27	-0.625555	-1.62835	0.044316	0.22274	0.946	6779	tags=48%, list=12%, signal=55%
GOBP_PRESYNAPTIC_ENDOCYTOSIS	GOBP_PRESYNAPTIC_ENDOCYTOSIS		59	-0.516561	-1.50515	0.0445736	0.285832	0.992	6911	tags=42%, list=12%, signal=48%
GOBP_RESPONSE_TO_ALKALOID	GOBP_RESPONSE_TO_ALKALOID		99	-0.395224	-1.39254	0.0446097	0.379393	0.999	9224	tags=35%, list=17%, signal=42%
GOCC_POSTSYNAPTIC_SPECIALIZATION_MEMBRANE	GOCC_POSTSYNAPTIC_SPECIALIZATION_MEMBRANE		109	-0.531176	-1.59304	0.0446602	0.238379	0.97	8212	tags=45%, list=15%, signal=53%
GOBP_TRNA_WOBBLE_BASE_MODIFICATION	GOBP_TRNA_WOBBLE_BASE_MODIFICATION		21	-0.621828	-1.5619	0.0448343	0.250034	0.982	9534	tags=48%, list=17%, signal=58%
GOBP_ORGANIC_HYDROXY_COMPOUND_TRANSPORT	GOBP_ORGANIC_HYDROXY_COMPOUND_TRANSPORT		267	-0.341958	-1.34244	0.0449219	0.407023	1	11313	tags=32%, list=20%, signal=40%
GOBP_CELLULAR_RESPONSE_TO_GLUCAGON_STIMULUS	GOBP_CELLULAR_RESPONSE_TO_GLUCAGON_STIMULUS		26	-0.544397	-1.47712	0.0451128	0.308581	0.996	15430	tags=69%, list=28%, signal=96%
GOMF_ACETYLCHOLINE_GATED_CATION_SELECTIVE_CHANNEL_ACTIVITY	GOMF_ACETYLCHOLINE_GATED_CATION_SELECTIVE_CHANNEL_ACTIVITY		16	-0.573179	-1.45646	0.0453608	0.331803	0.997	16505	tags=69%, list=30%, signal=98%
GOBP_REGULATION_OF_SYNAPTIC_VESICLE_EXOCYTOSIS	GOBP_REGULATION_OF_SYNAPTIC_VESICLE_EXOCYTOSIS		55	-0.52583	-1.52606	0.0458015	0.273033	0.989	12222	tags=56%, list=22%, signal=72%
GOBP_POSITIVE_T_CELL_SELECTION	GOBP_POSITIVE_T_CELL_SELECTION		36	-0.684987	-1.65192	0.0464217	0.213535	0.933	12501	tags=72%, list=23%, signal=93%
GOBP_MUSCLE_CONTRACTION	GOBP_MUSCLE_CONTRACTION		349	-0.404899	-1.4794	0.0465587	0.308085	0.996	9465	tags=37%, list=17%, signal=44%
GOBP_METANEPHRIC_GLOMERULUS_DEVELOPMENT	GOBP_METANEPHRIC_GLOMERULUS_DEVELOPMENT		15	-0.639539	-1.51716	0.0468432	0.274867	0.99	7628	tags=53%, list=14%, signal=62%
GOBP_LONG_TERM_SYNAPTIC_POTENTIATION	GOBP_LONG_TERM_SYNAPTIC_POTENTIATION		83	-0.472248	-1.46821	0.0469043	0.319703	0.996	11281	tags=48%, list=20%, signal=60%
GOMF_ALKALI_METAL_ION_BINDING	GOMF_ALKALI_METAL_ION_BINDING		16	-0.539259	-1.46066	0.0471311	0.326102	0.996	7330	tags=50%, list=13%, signal=58%
GOBP_CELL_DIFFERENTIATION_IN_SPINAL_CORD	GOBP_CELL_DIFFERENTIATION_IN_SPINAL_CORD		49	-0.404831	-1.33348	0.0474383	0.409746	1	16335	tags=47%, list=30%, signal=67%
GOBP_RETROGRADE_AXONAL_TRANSPORT	GOBP_RETROGRADE_AXONAL_TRANSPORT		21	-0.634861	-1.50866	0.0476191	0.282158	0.99	12434	tags=62%, list=22%, signal=80%
GOBP_ADENYLATE_CYCLASE_ACTIVATING_ADRENERGIC_RECEPTOR_SIGNALING_PATHWAY	GOBP_ADENYLATE_CYCLASE_ACTIVATING_ADRENERGIC_RECEPTOR_SIGNALING_PATHWAY		25	-0.554105	-1.5029	0.0476191	0.289124	0.992	16448	tags=52%, list=30%, signal=74%
GOMF_PEPTIDE_BINDING	GOMF_PEPTIDE_BINDING		313	-0.38228	-1.41471	0.0477099	0.358535	0.999	13826	tags=45%, list=25%, signal=60%
GOBP_EXPLORATION_BEHAVIOR	GOBP_EXPLORATION_BEHAVIOR		19	-0.621084	-1.56995	0.0478012	0.250223	0.98	7081	tags=58%, list=13%, signal=66%
GOMF_FERROUS_IRON_BINDING	GOMF_FERROUS_IRON_BINDING		26	-0.505503	-1.49119	0.0478012	0.30009	0.994	19540	tags=62%, list=35%, signal=95%
GOBP_POSITIVE_REGULATION_OF_SODIUM_ION_TRANSPORT	GOBP_POSITIVE_REGULATION_OF_SODIUM_ION_TRANSPORT		35	-0.469704	-1.4844	0.0479042	0.303652	0.995	5430	tags=40%, list=10%, signal=44%
GOBP_SEX_DETERMINATION	GOBP_SEX_DETERMINATION		19	-0.529866	-1.45475	0.0479042	0.332631	0.997	8516	tags=47%, list=15%, signal=56%
GOBP_RELEASE_OF_SEQUESTERED_CALCIUM_ION_INTO_CYTOSOL_BY_ENDOPLASMIC_RETICULUM	GOBP_RELEASE_OF_SEQUESTERED_CALCIUM_ION_INTO_CYTOSOL_BY_ENDOPLASMIC_RETICULUM		33	-0.585427	-1.56934	0.048	0.250508	0.98	9731	tags=58%, list=18%, signal=70%
GOBP_SULFUR_COMPOUND_CATABOLIC_PROCESS	GOBP_SULFUR_COMPOUND_CATABOLIC_PROCESS		56	-0.42562	-1.44129	0.048	0.337066	0.997	15392	tags=43%, list=28%, signal=59%
GOBP_VESICLE_MEDIATED_TRANSPORT_IN_SYNAPSE	GOBP_VESICLE_MEDIATED_TRANSPORT_IN_SYNAPSE		194	-0.477074	-1.49993	0.0480769	0.290239	0.992	10394	tags=47%, list=19%, signal=58%
GOCC_INTRINSIC_COMPONENT_OF_POSTSYNAPTIC_SPECIALIZATION_MEMBRANE	GOCC_INTRINSIC_COMPONENT_OF_POSTSYNAPTIC_SPECIALIZATION_MEMBRANE		69	-0.530703	-1.53819	0.0482625	0.266761	0.988	8212	tags=46%, list=15%, signal=54%
GOBP_REGULATION_OF_MUSCLE_SYSTEM_PROCESS	GOBP_REGULATION_OF_MUSCLE_SYSTEM_PROCESS		235	-0.377281	-1.41875	0.0488798	0.357364	0.999	9465	tags=36%, list=17%, signal=43%
GOBP_MACROPHAGE_CHEMOTAXIS	GOBP_MACROPHAGE_CHEMOTAXIS		38	-0.460172	-1.46974	0.0490798	0.318527	0.996	10277	tags=53%, list=19%, signal=65%
GOBP_MAST_CELL_ACTIVATION	GOBP_MAST_CELL_ACTIVATION		60	-0.55063	-1.59355	0.0491159	0.23845	0.97	10407	tags=52%, list=19%, signal=64%
GOBP_ACTIVATION_OF_PROTEIN_KINASE_A_ACTIVITY	GOBP_ACTIVATION_OF_PROTEIN_KINASE_A_ACTIVITY		18	-0.597743	-1.49654	0.0493359	0.292381	0.993	15430	tags=72%, list=28%, signal=100%
GOBP_GAMMA_AMINOBUTYRIC_ACID_SIGNALING_PATHWAY	GOBP_GAMMA_AMINOBUTYRIC_ACID_SIGNALING_PATHWAY		27	-0.516984	-1.43829	0.0493359	0.339576	0.997	8862	tags=41%, list=16%, signal=48%
GOMF_CALMODULIN_DEPENDENT_PROTEIN_KINASE_ACTIVITY	GOMF_CALMODULIN_DEPENDENT_PROTEIN_KINASE_ACTIVITY		27	-0.483969	-1.45964	0.0496183	0.326964	0.996	8433	tags=37%, list=15%, signal=44%
GOBP_REGULATION_OF_MUSCLE_CONTRACTION	GOBP_REGULATION_OF_MUSCLE_CONTRACTION		158	-0.398446	-1.44079	0.0497925	0.337445	0.997	9731	tags=39%, list=18%, signal=47%
GOBP_REGULATION_OF_CALCIUM_ION_IMPORT	GOBP_REGULATION_OF_CALCIUM_ION_IMPORT		40	-0.419346	-1.40579	0.049904	0.364564	0.999	8397	tags=35%, list=15%, signal=41%
